# Supplementary material for: Sponge-like macroporous cyclodextrin-based cryogels for controlled drug delivery
Source: Royal Society of Chemistry journal article supplement (doi:10.1039/d3qm00139c), 2023-01-01
Supplement: d3qm00139c1.pdf [file d3qm00139c1.pdf]

Electronic Supplementary Material (ESI) for Materials Chemistry Frontiers.

This journal is © the Partner Organisations 2022

## Sponge-Like Macroporous Cyclodextrin-Based Cryogels for Controlled Drug Delivery

Chiara Zagni,<sup>a†</sup> Alessandro Coco,<sup>b†</sup> Tommaso Mecca,<sup>\*c</sup> Giusy Curcuruto,<sup>b</sup> Vincenzo Patamia,<sup>a</sup> Katia Mangano,<sup>d</sup> Antonio Rescifina,<sup>\*ab</sup> Sabrina Carola Carroccio<sup>b</sup>

<sup>a</sup> Department of Drug and Health Sciences, University of Catania, V.le A. Doria 6, 95125, Catania, Italy. E-mail: arescifina@unict.it

<sup>b</sup> Institute for Polymers, Composites, and Biomaterials CNR-IPCB, Via Paolo Gaifami 18, 95126, Catania, Italy

<sup>c</sup> Institute of Biomolecular Chemistry CNR-ICB, Via Paolo Gaifami 18, 95126, Catania, Italy. E-mail: Tommaso.mecca@icb.cnr.it

<sup>d</sup> Department of Biomedical and Biotechnological Sciences, Oncologic, Clinical, and General Pathology Section, University of Catania, Catania, Italy

† These authors contributed equally

### Table of contents

NMR spectra of synthesized monomers 1–6

Enlarged portion of MALDI-TOF MS spectra registered in reflection and positive mode for samples 1–6.

FT-IR spectra of synthesized CD-HEMA cryogels

TGA analysis of synthesized cryogels

Calibration line of LOM and PIR by UV-vis

Calibration line of FLU and multidrug by UV-vis

*In vitro* release profiles of LOM and PIR from HEMA in media with pH a) 3 and b) 7.4 at 37 °C.

*In vitro* release profiles of FLU and Multidrug from HEMA in media with pH a) 3 and b) 7.4 at 37 °C

*In vitro* release profiles of LOM and PIR from  $\alpha$ -CD cryogels in media with pH a) 3 and b) 7.4 at 37 °C.

*In vitro* release profiles of FLU and Multidrug from  $\alpha$ -CD cryogels in media with pH a) 3 and b) 7.4 at 37 °C.

*In vitro* release profiles of LOM and PIR from  $\beta$ -CD cryogels in media with pH a) 3 and b) 7.4 at 37 °C.

*In vitro* release profiles of FLU and Multidrug from  $\beta$ -CD cryogels in media with pH a) 3 and b) 7.4 at 37 °C

*In vitro* release profiles of LOM and PIR from  $\gamma$ -CD cryogels in media with pH a) 3 and b) 7.4 at 37 °C.

*In vitro* release profiles of FLU and Multidrug from  $\gamma$ -CD cryogels in media with pH a) 3 and b) 7.4 at 37 °C.

Pictures of a patch sample

Kinetic release parameters for Lomefloxacin from cryogel samples at pH 3 and 7.4

Kinetic release parameters for Piroxicam from cryogel samples at pH 3 and 7.4

Kinetic release parameters for Fluconazole from cryogel samples at pH 3 and 7.4

Kinetic release parameters for Lomefloxacin in multidrug formulation from cryogel samples at pH 3 and 7.4

Kinetic release parameters for Piroxicam in multidrug formulation from cryogel samples at pH 3 and 7.4

## NMR spectra of synthesized monomers 1–6

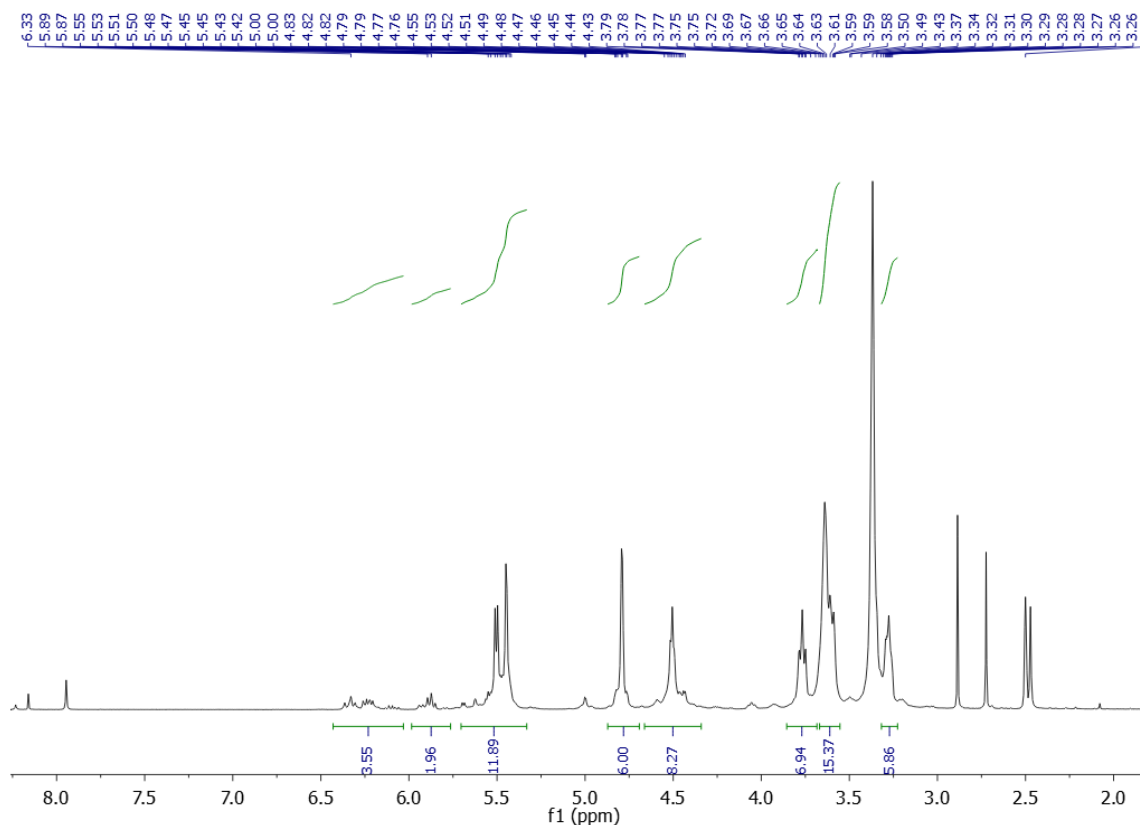

Fig. S1  $^1\text{H}$  NMR spectrum of compound 1.

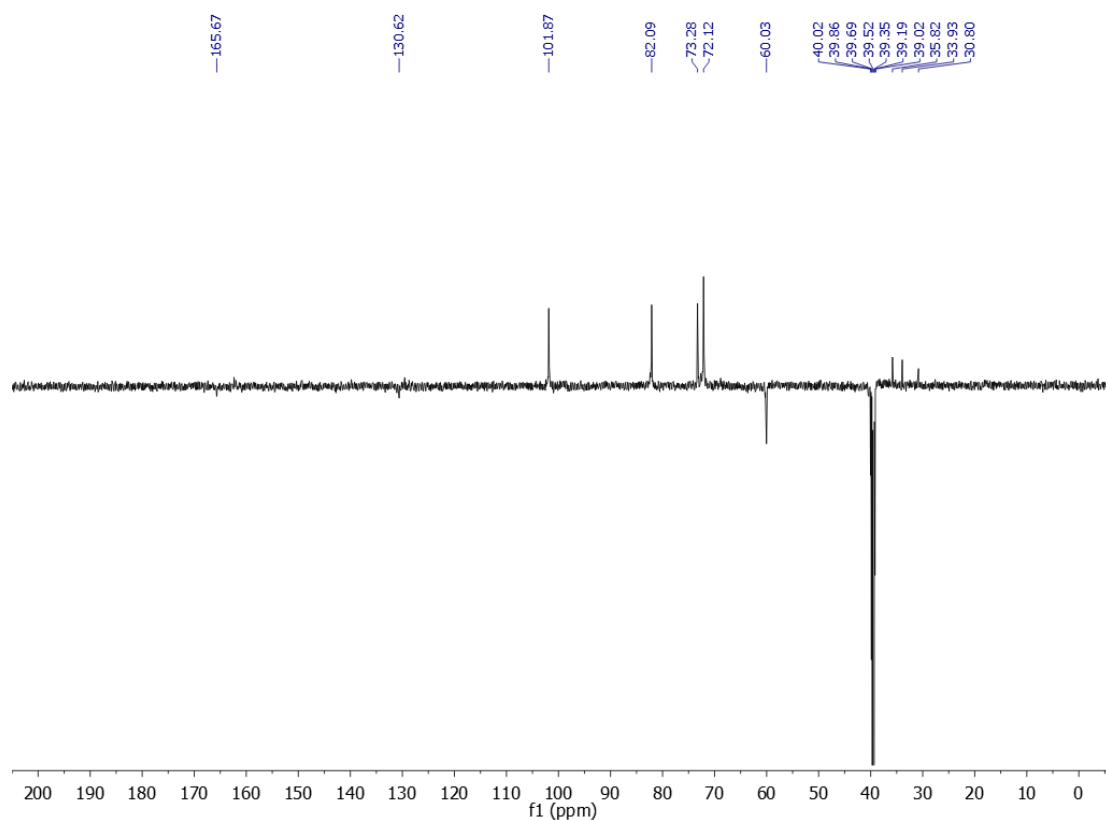

Fig. S2 APT NMR spectrum of compound 1.

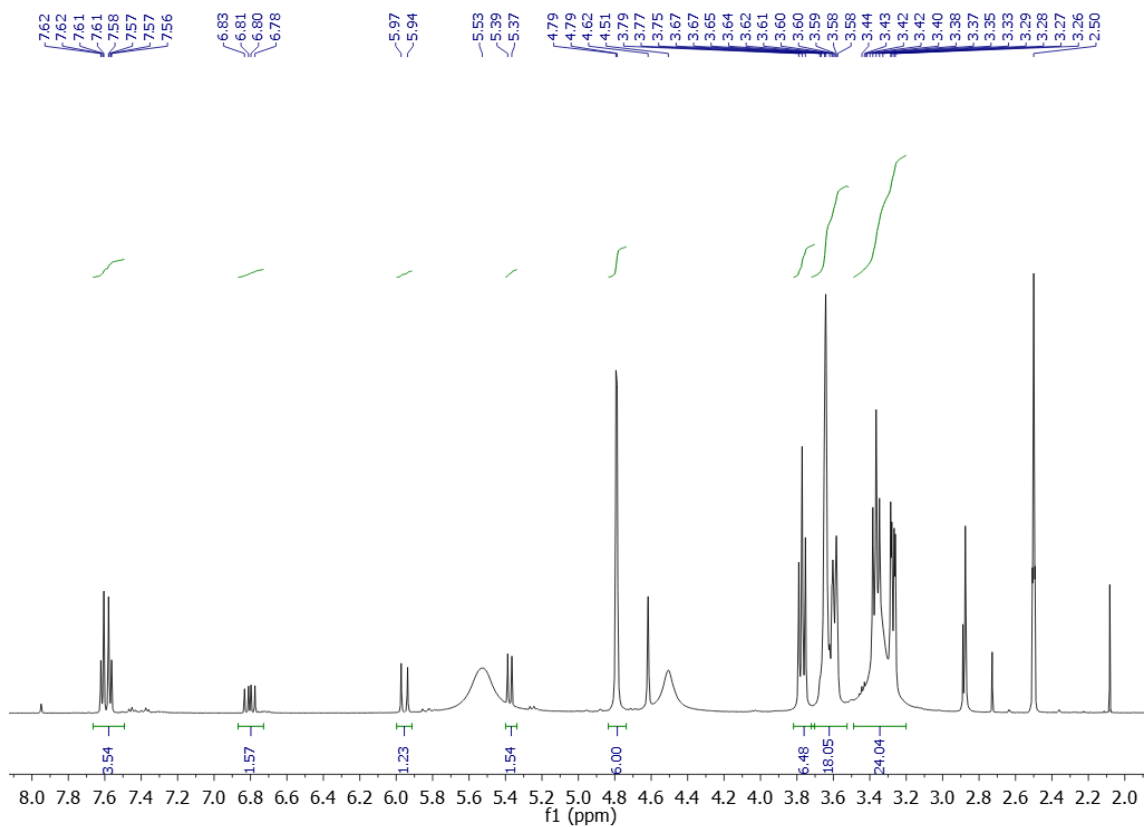

Fig. S3  $^1\text{H}$  NMR spectrum of compound 2

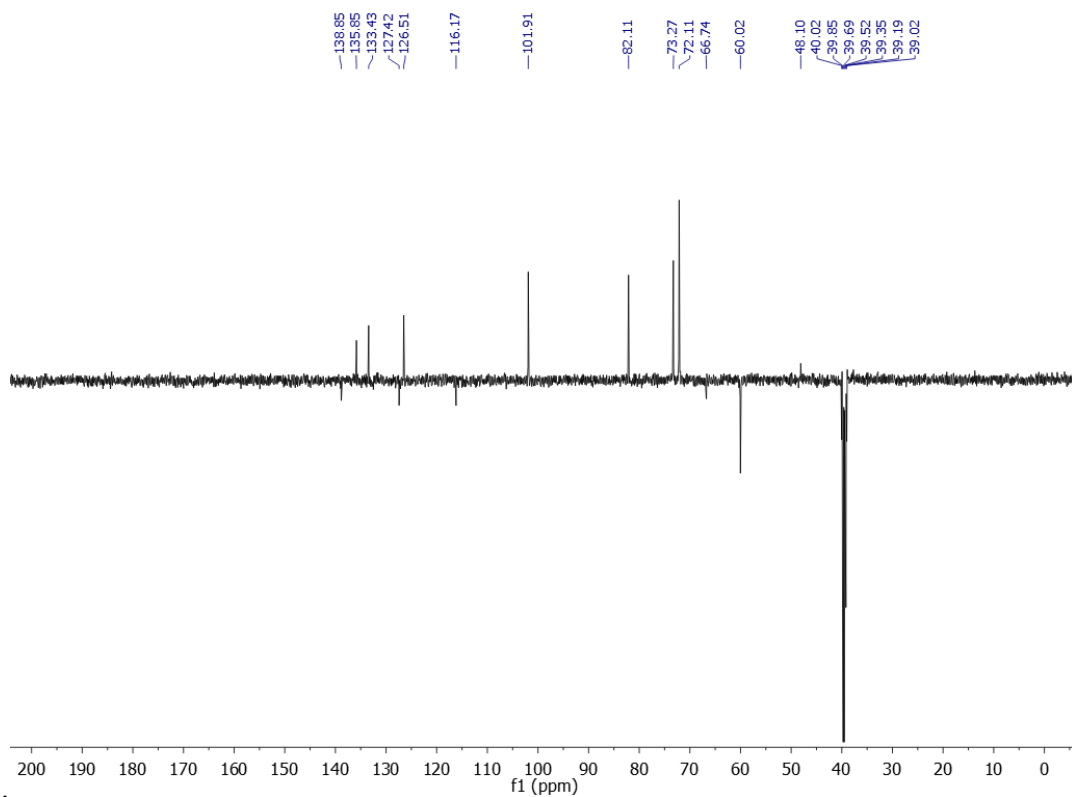

Fig. S4 APT NMR spectrum of compound 2.

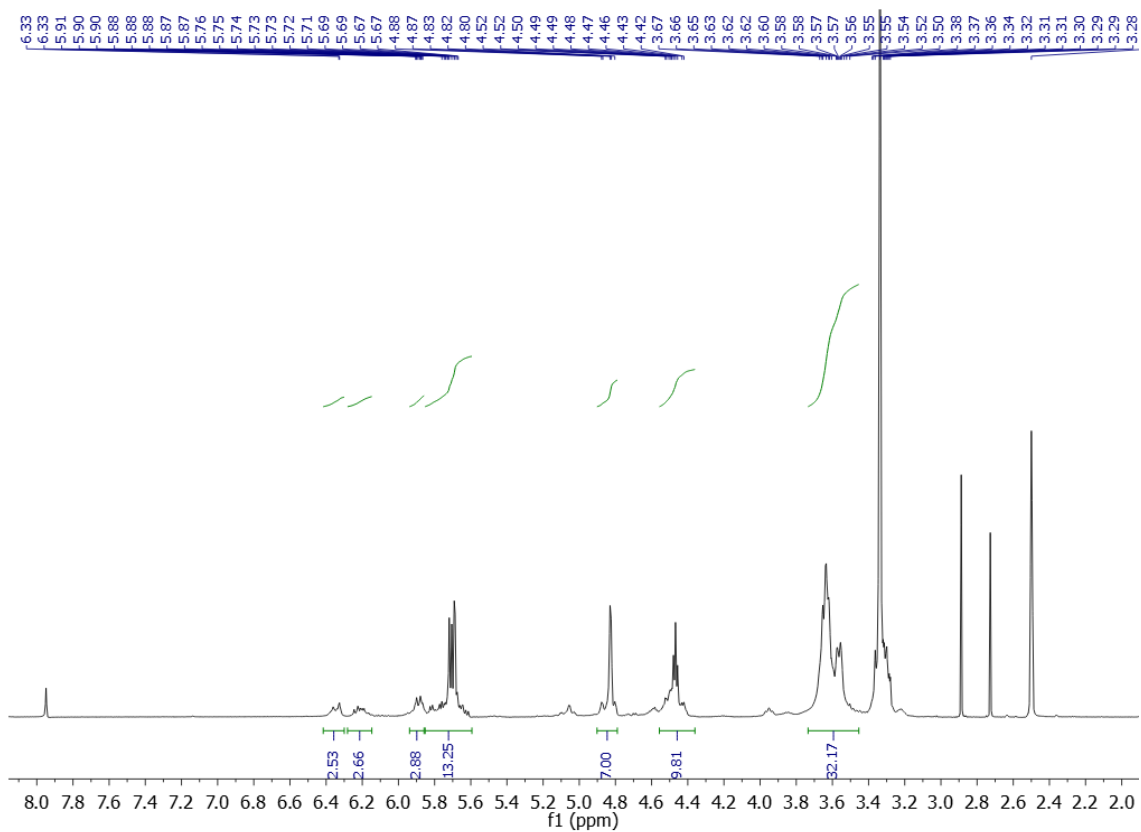

Fig. S5  $^1\text{H}$  NMR spectrum of compound **3**.

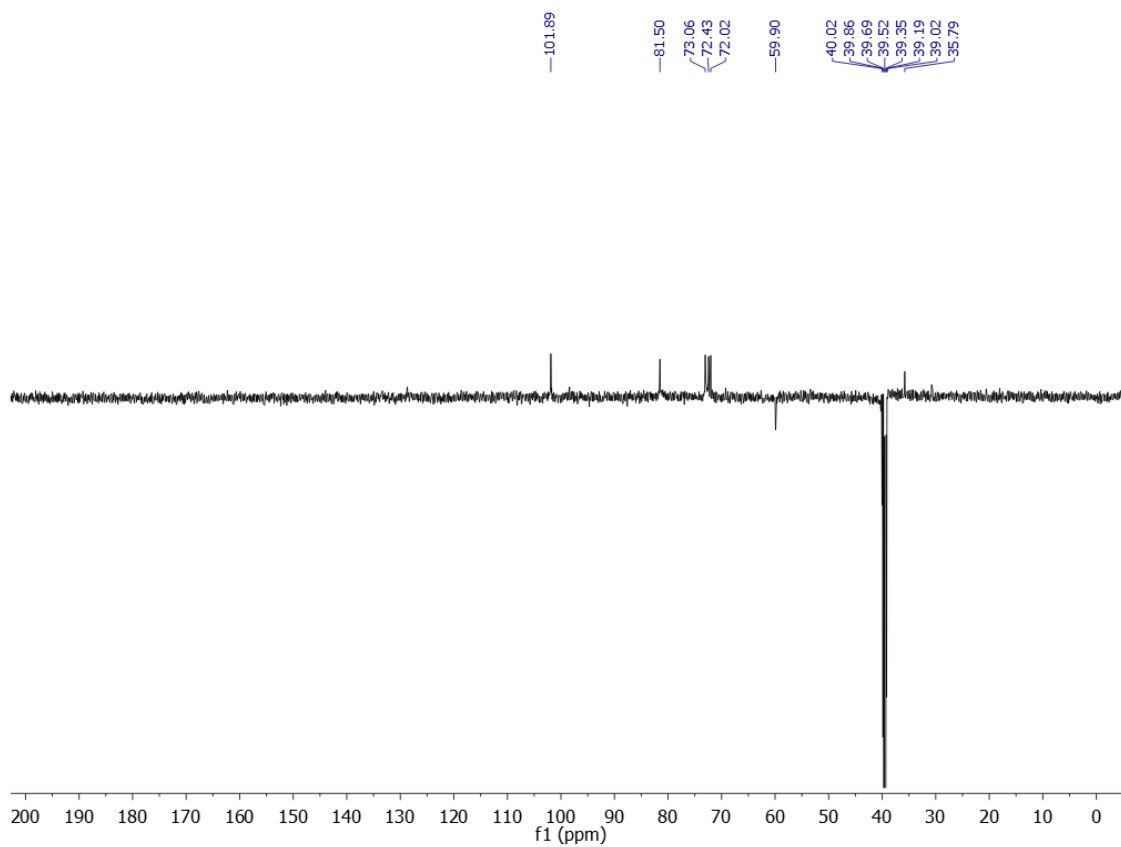

Fig. S6 APT NMR spectrum of compound **3**.

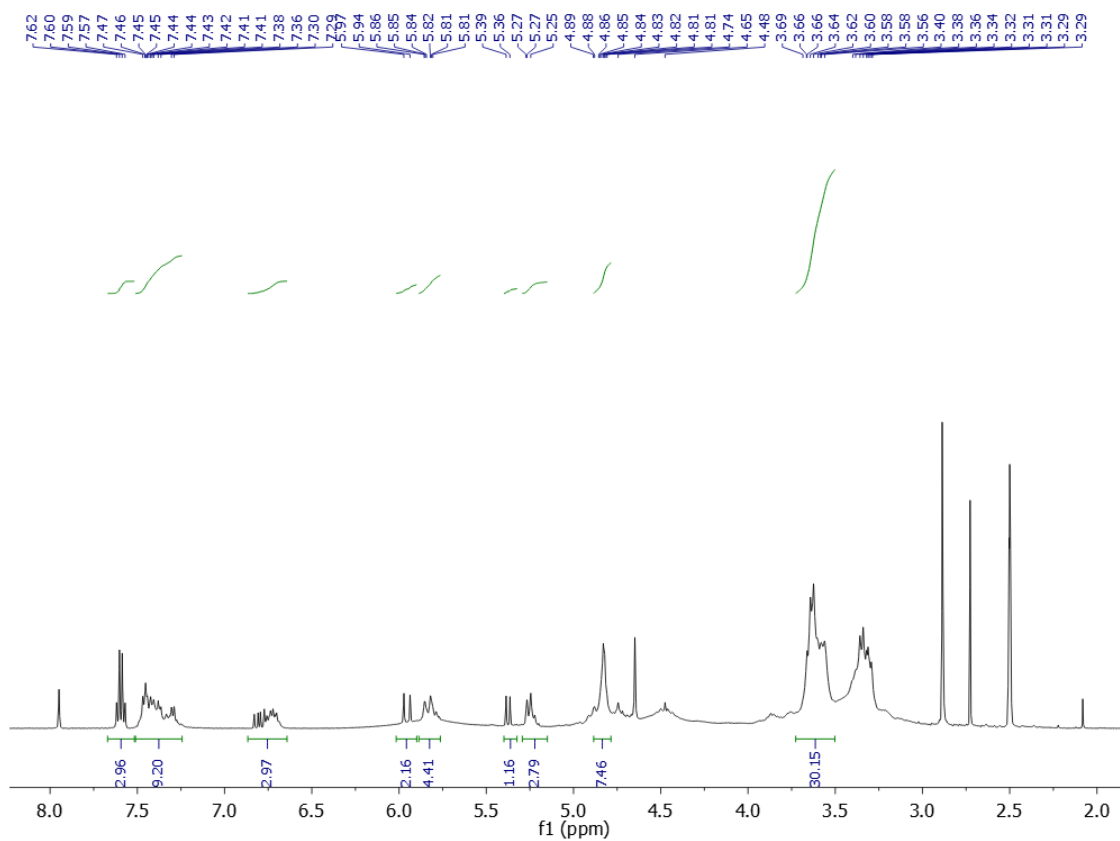

Fig. S7  $^1\text{H}$  NMR spectrum of compound 4.

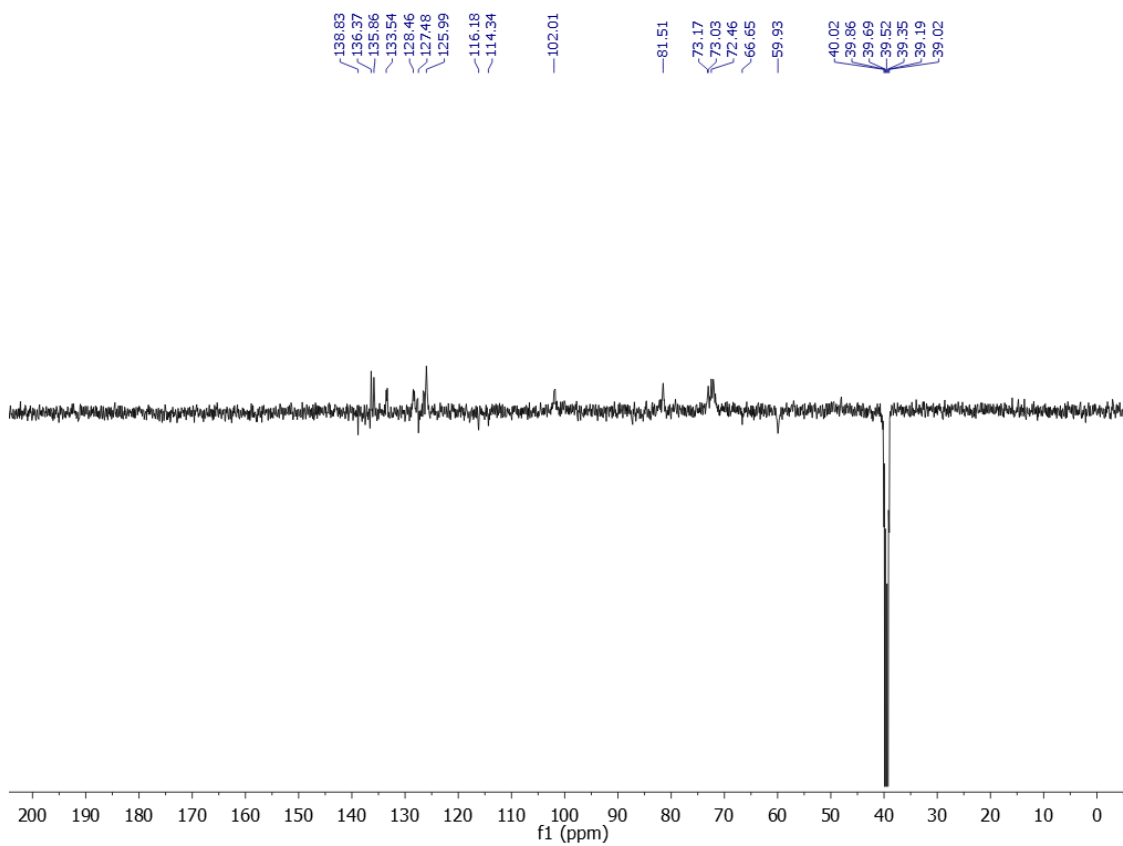

Fig. S8 APT NMR spectrum of compound 4.

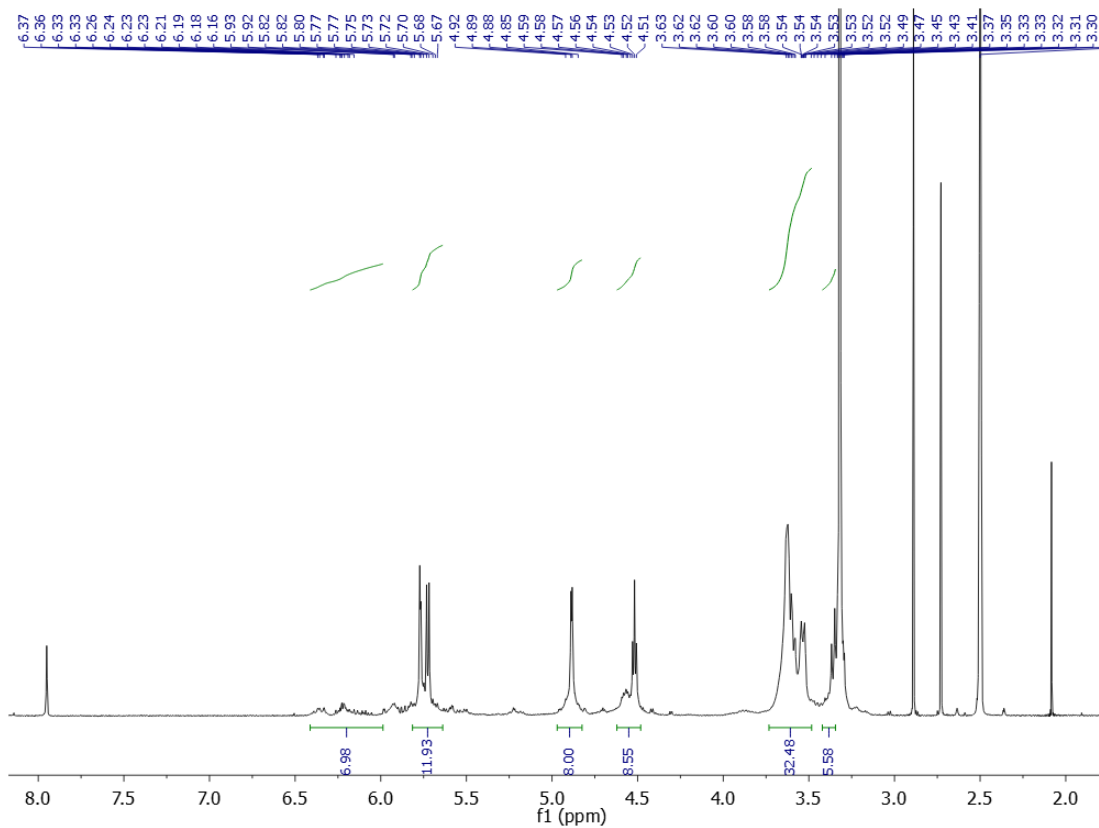

Fig. S9  $^1\text{H}$  NMR spectrum of compound **5**.

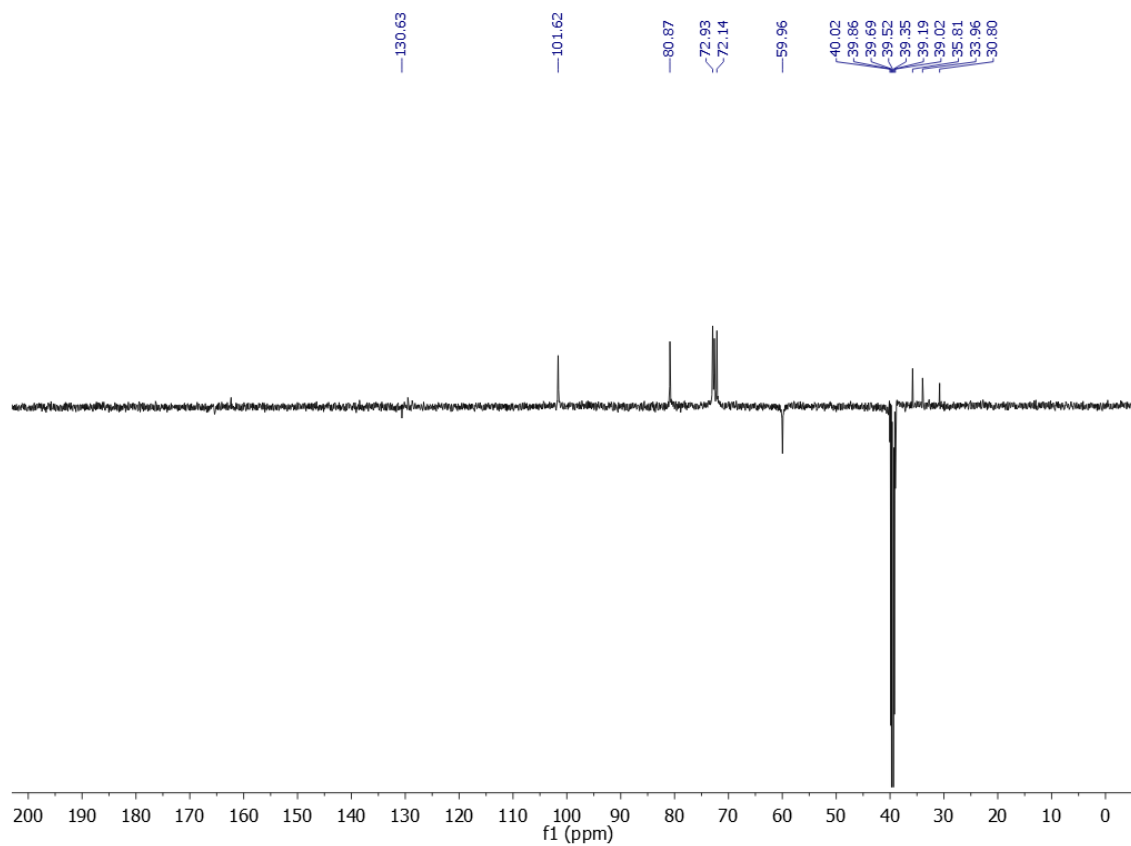

Fig. S10 APT NMR spectrum of compound **5**.

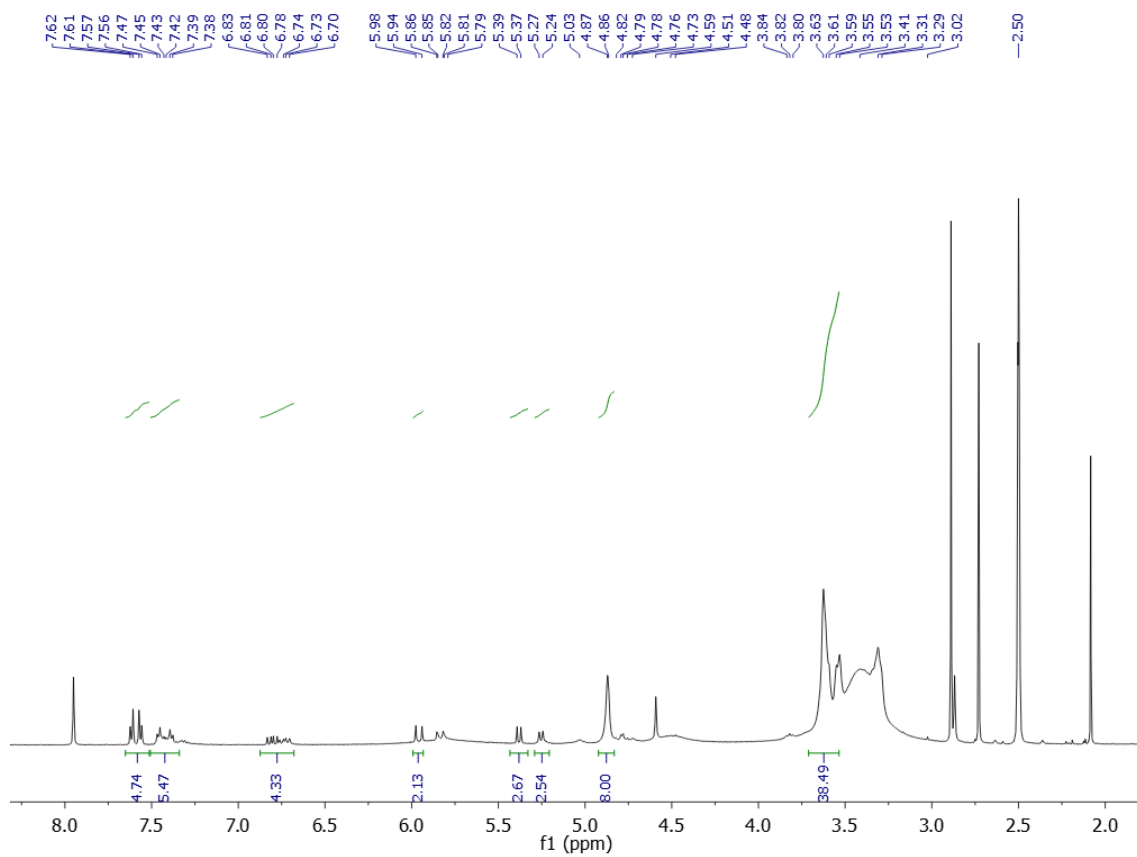

Fig. S11  $^1\text{H}$  NMR spectrum of compound **6**.

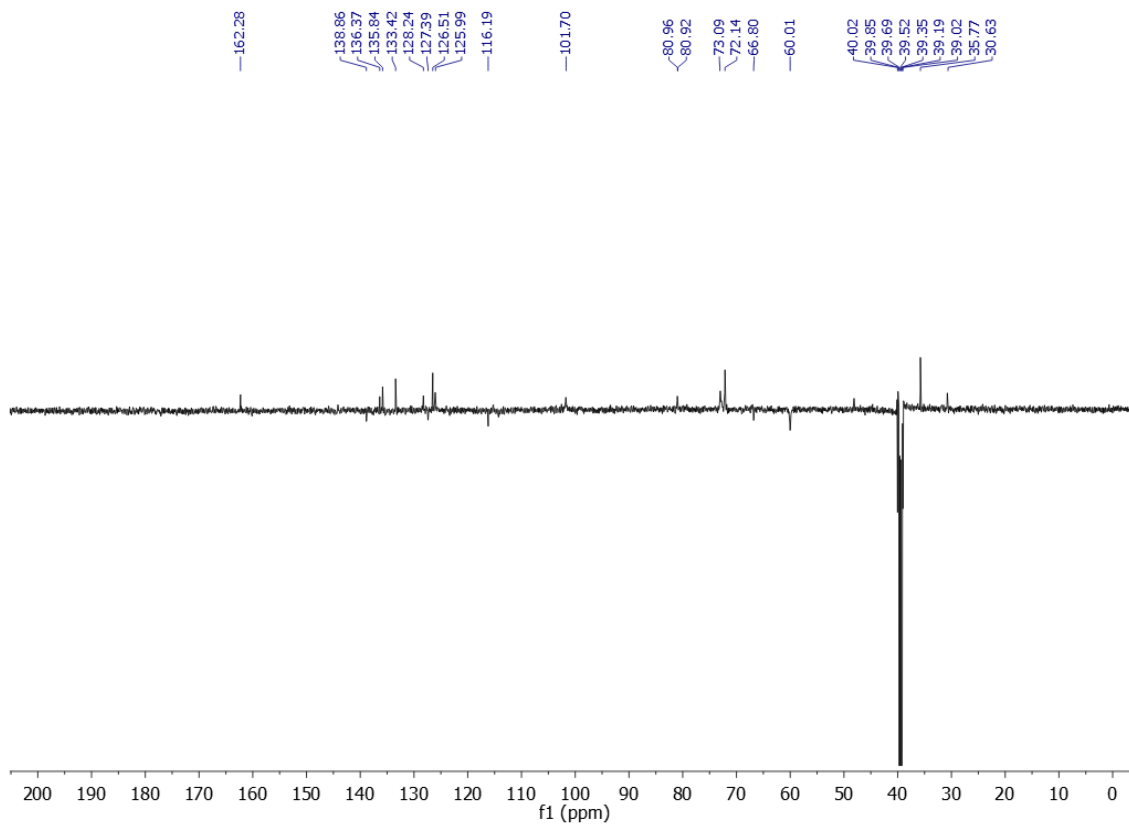

Fig. S12 APT NMR spectrum of compound **6**.

Enlarged portion of MALDI-TOF MS spectra registered in reflection and positive mode for samples 1–6.

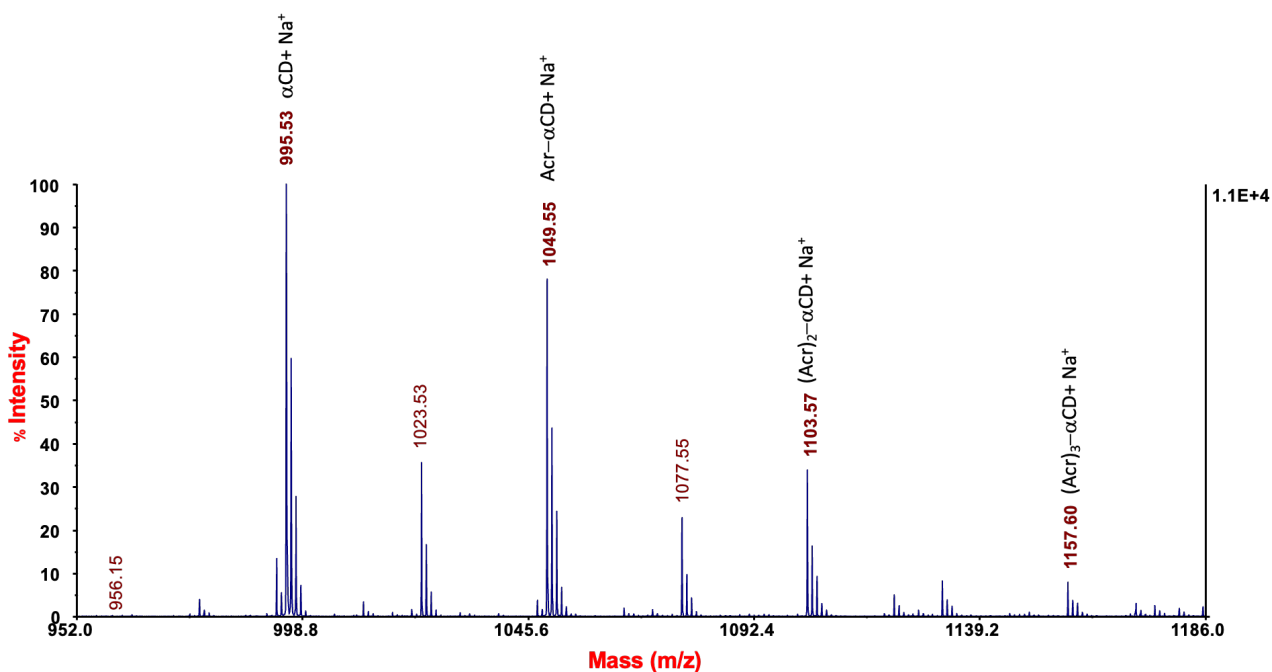

Fig. S13 MALDI-TOF MS spectrum of compound 1.

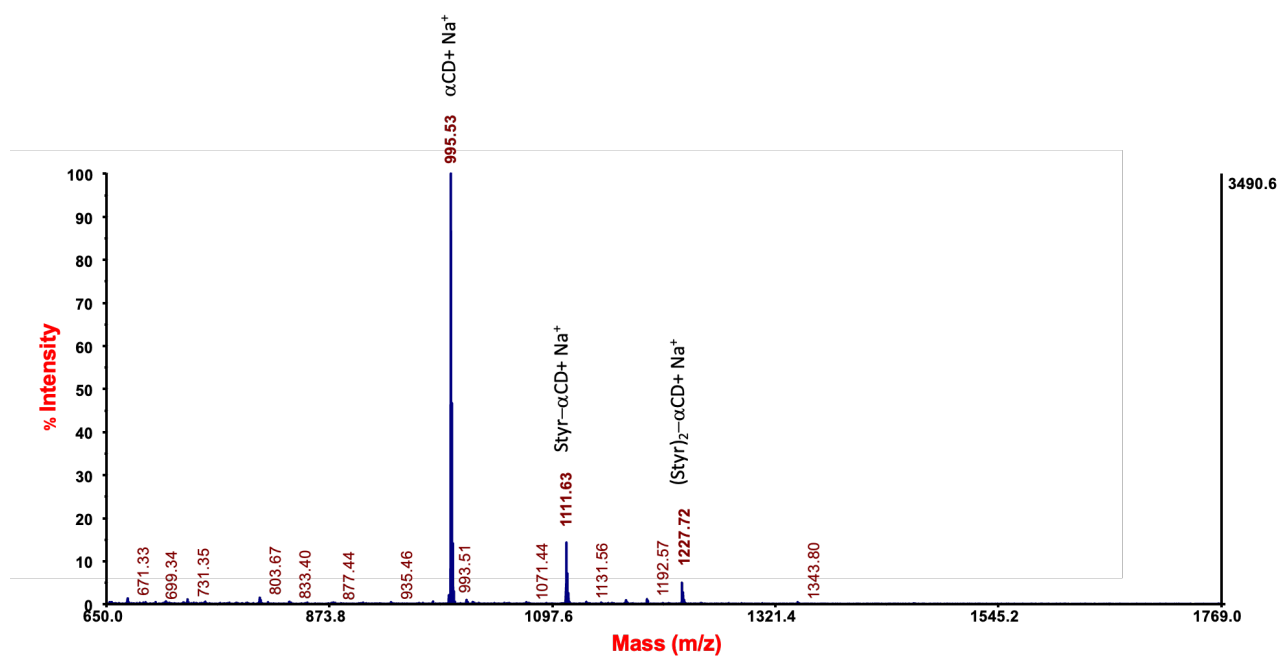

Fig. S14 MALDI-TOF MS spectrum of compound 2.



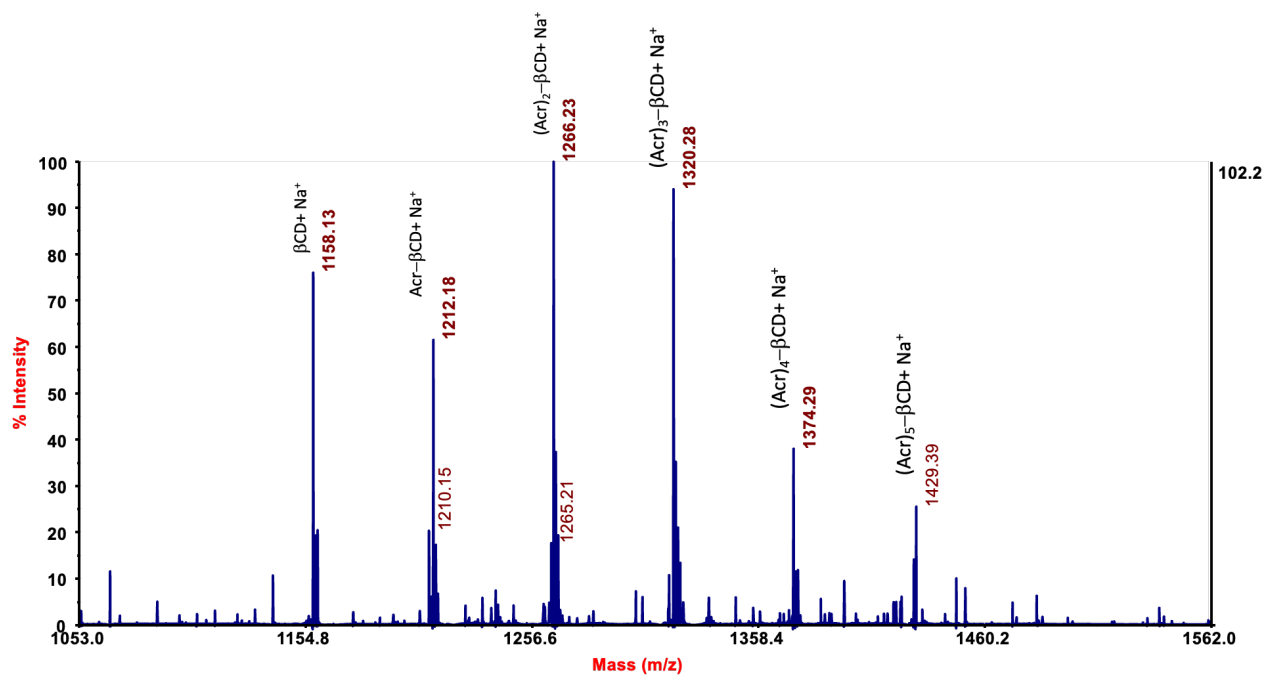

Fig. S15 MALDI-TOF MS spectrum of compound 3.

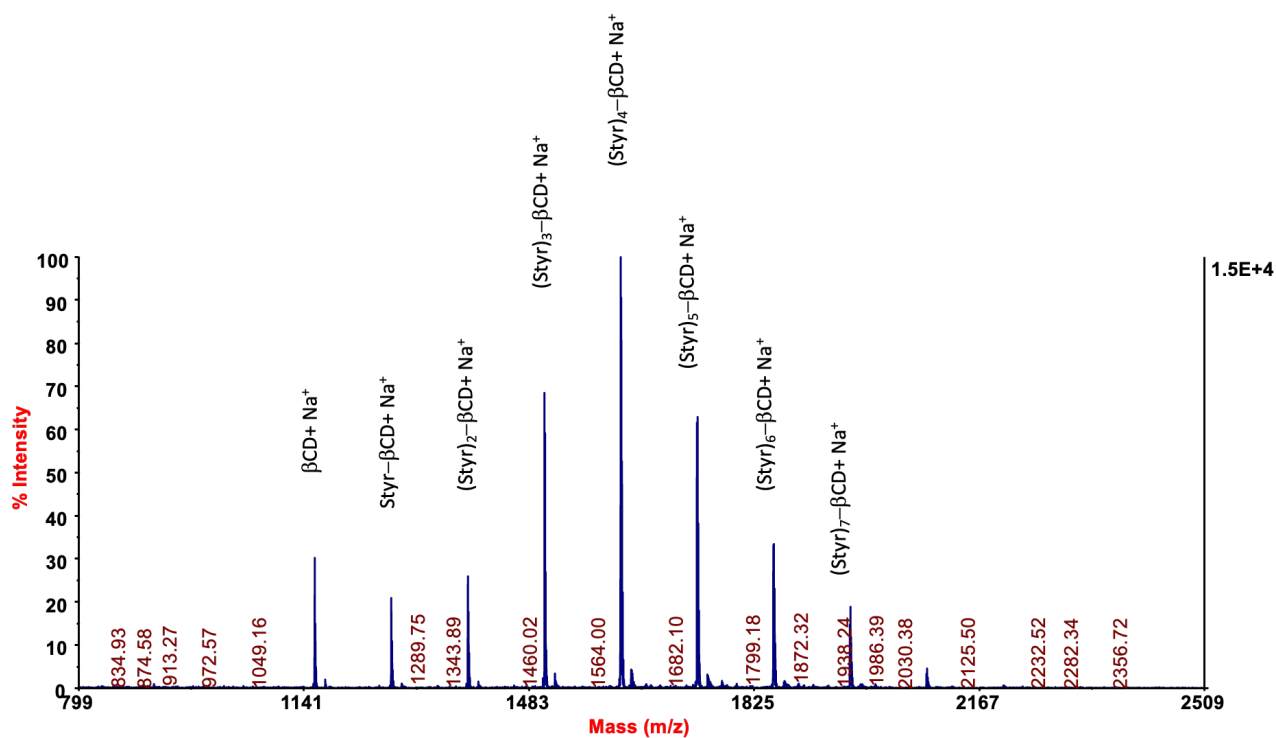

Fig. S16 MALDI-TOF MS spectrum of compound 4.

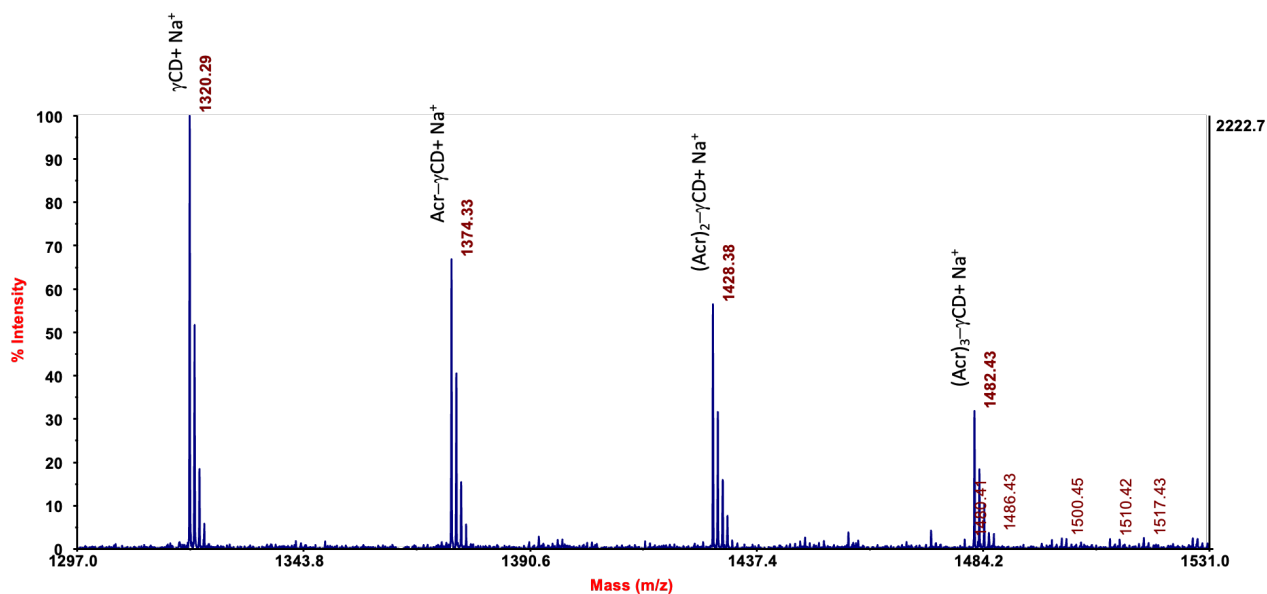

Fig. S17 MALDI-TOF MS spectrum of compound 5.

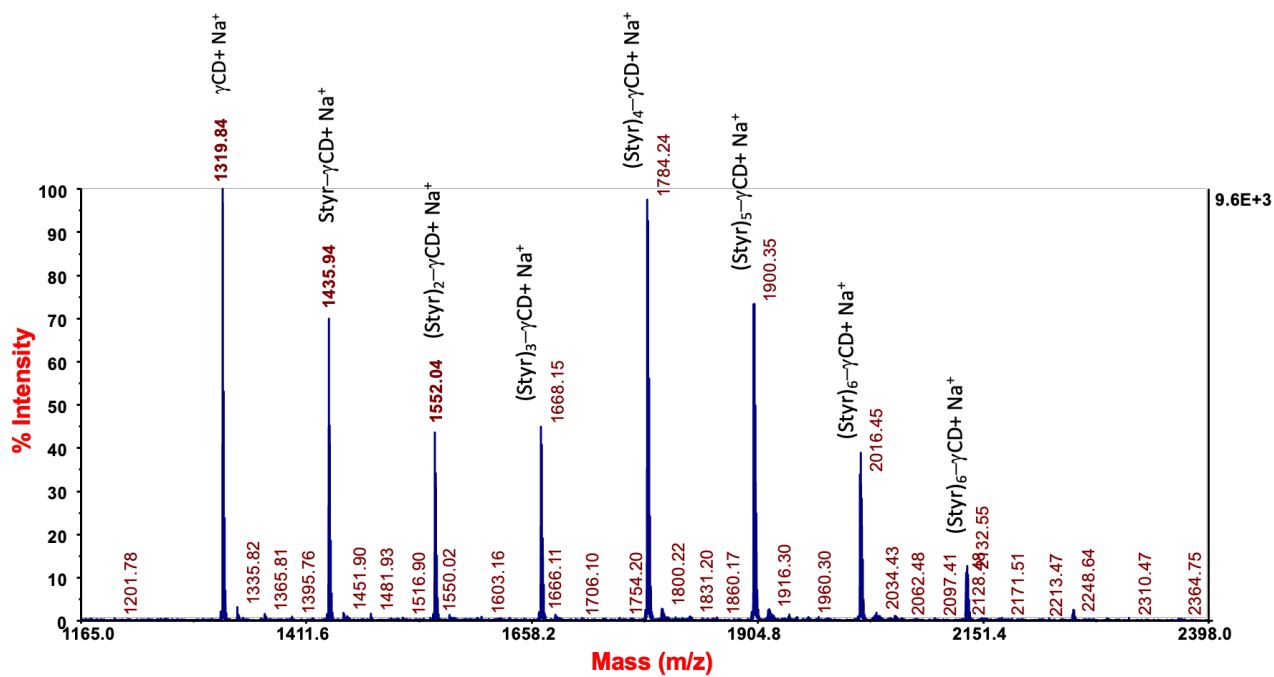

Fig. S18 MALDI-TOF MS spectrum of compound 6.

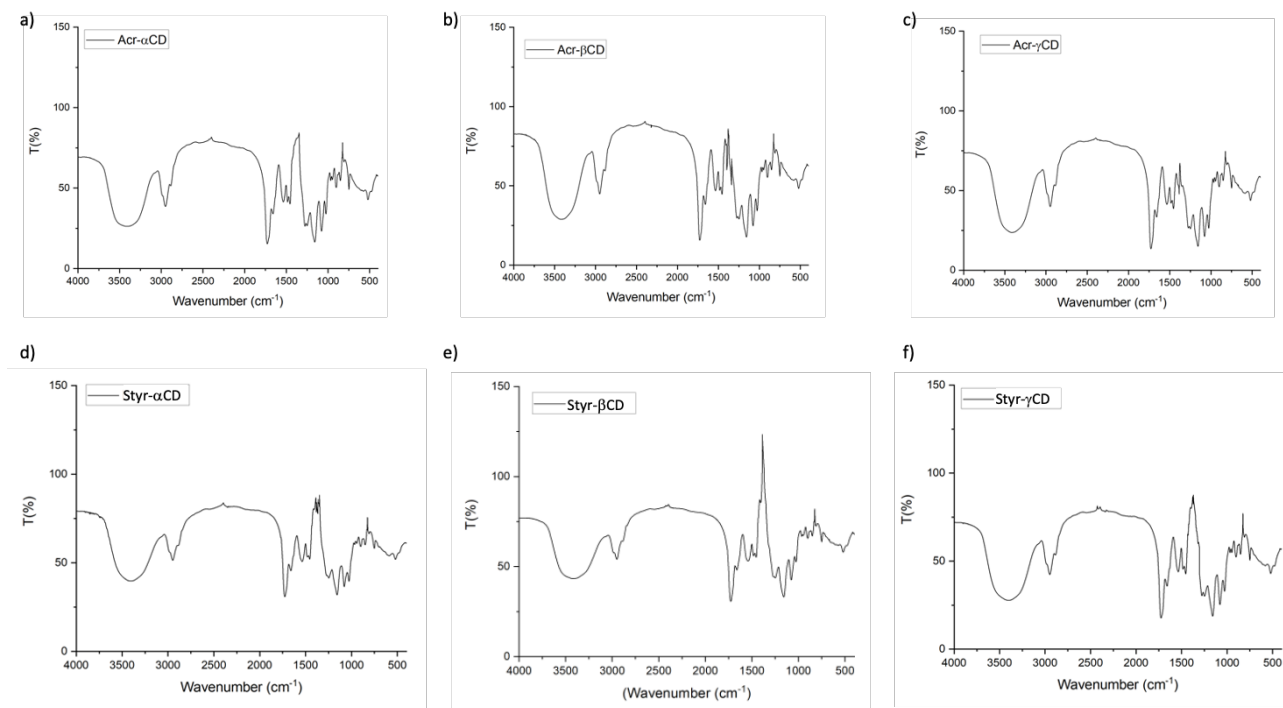

**Fig. S19** FT-IR spectra of synthesized CD-HEMA cryogels.

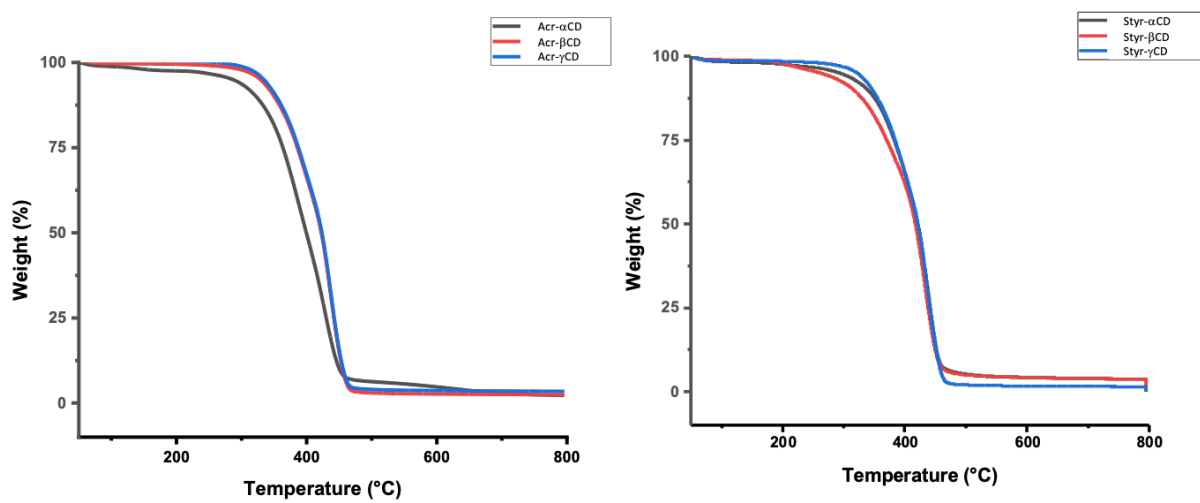

**Fig. S20** TGA analysis of synthesized cryogels.

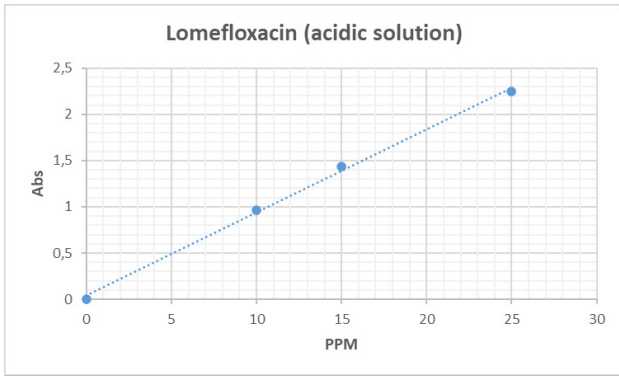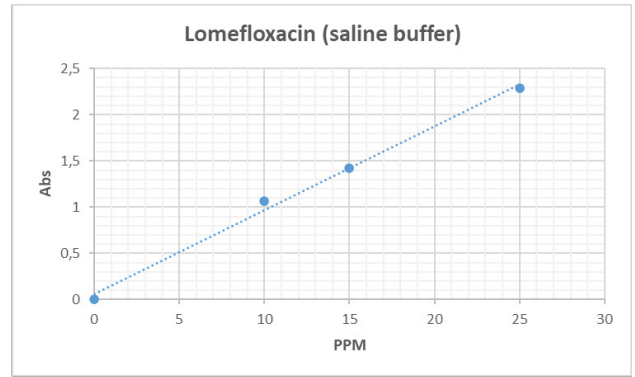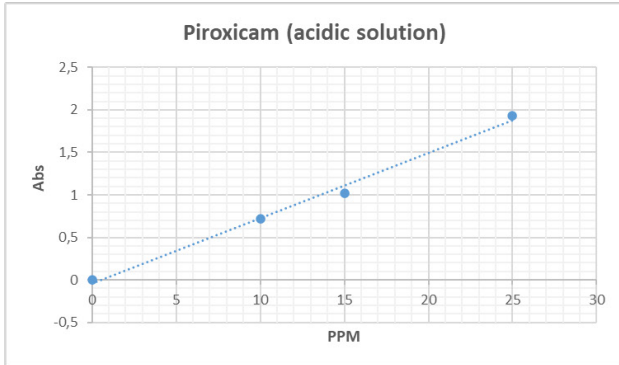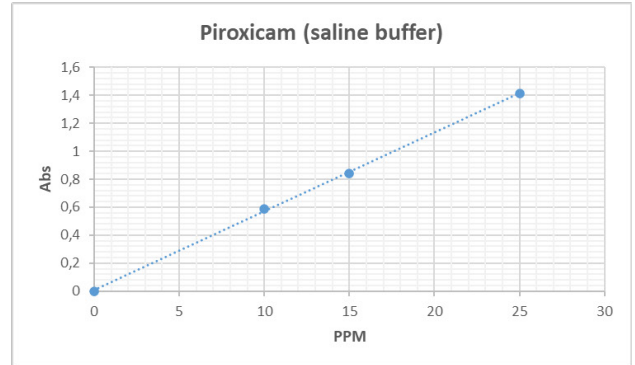

Fig. S21 Calibration line of LOM and PIR by UV-vis.

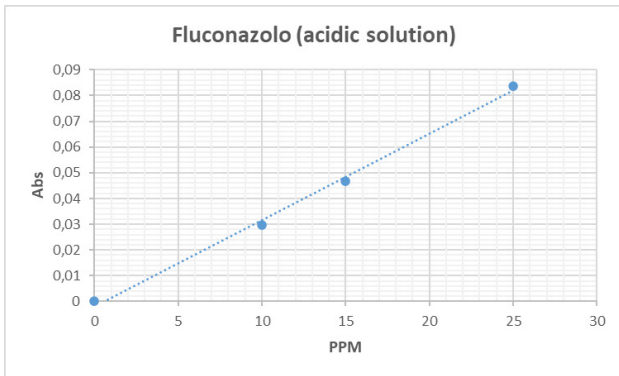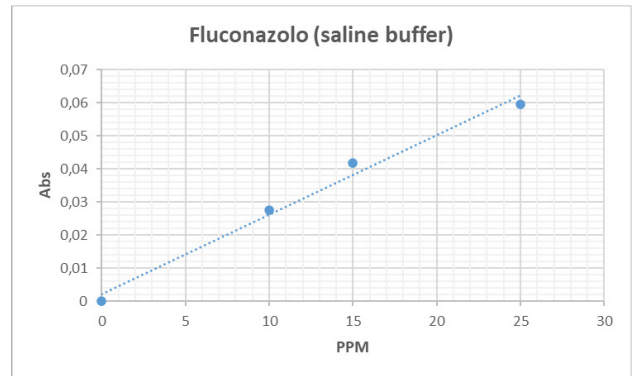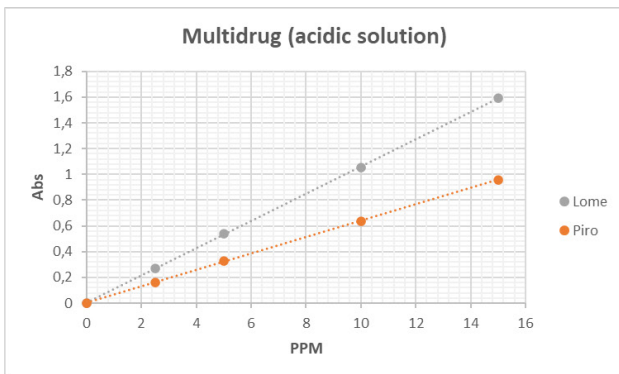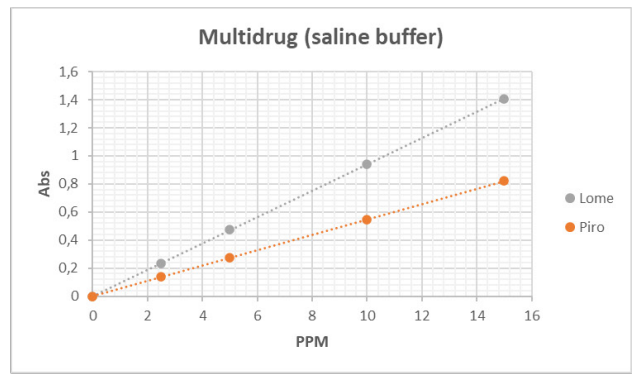

Fig. S22 Calibration line of FLU and multidrug by UV-vis.

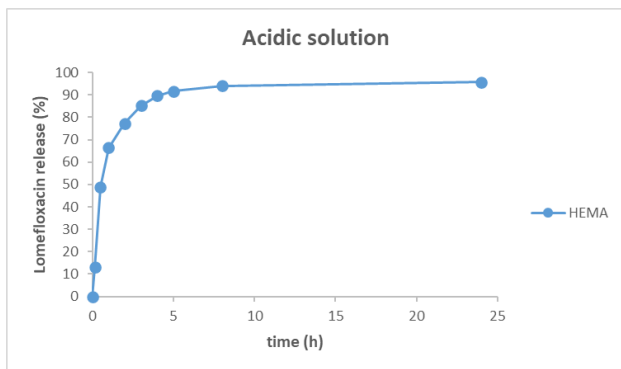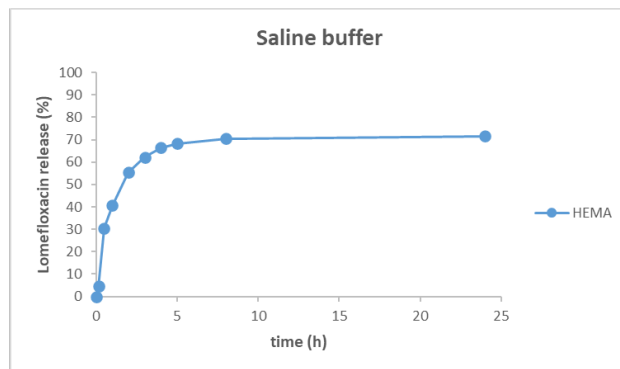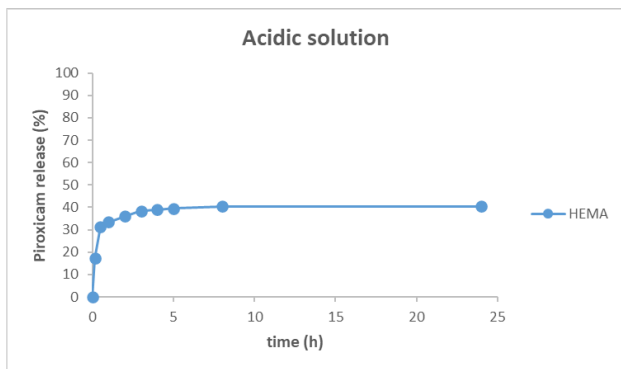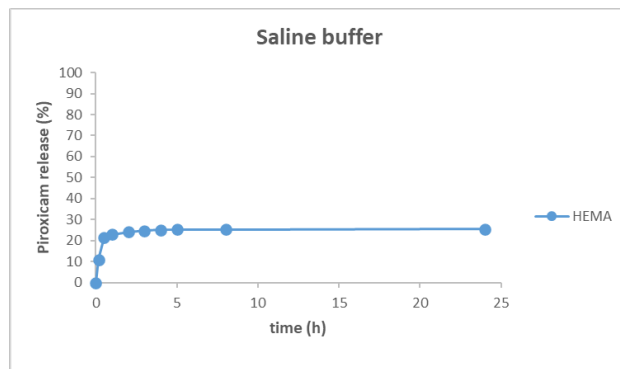

**Fig. S23** *In vitro* release profiles of LOM and PIR from HEMA in media with pH a) 3 and b) 7.4 at 37 °C.

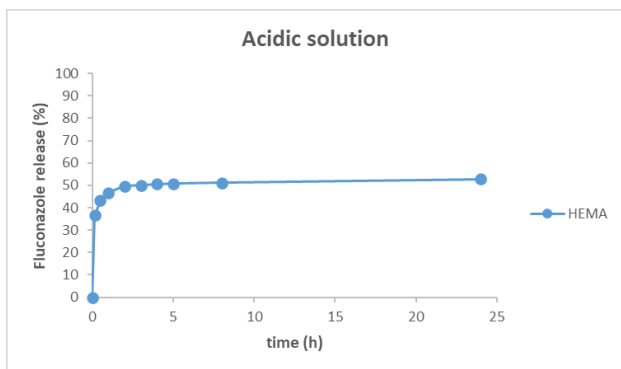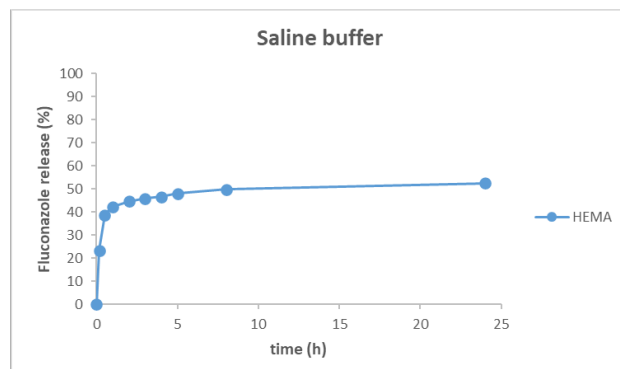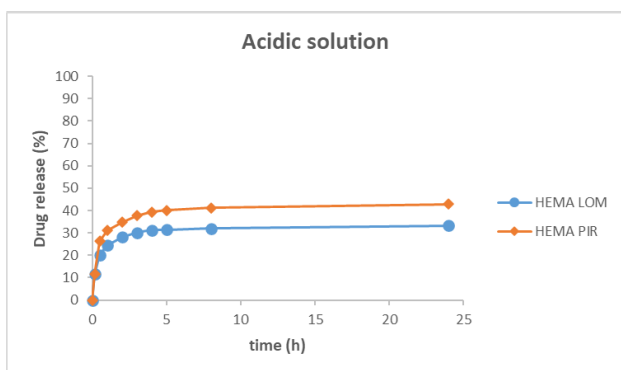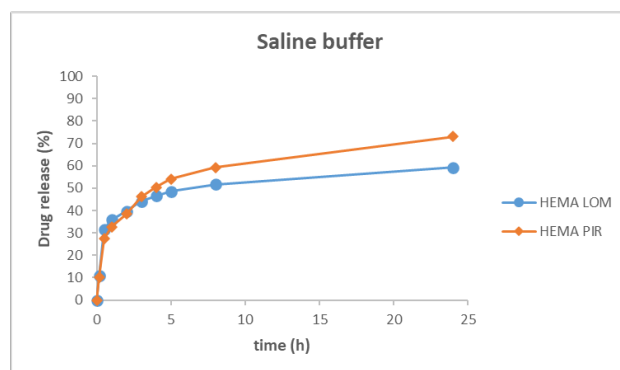

**Fig. S24** *In vitro* release profiles of FLU and Multidrug from HEMA in media with pH a) 3 and b) 7.4 at 37 °C.

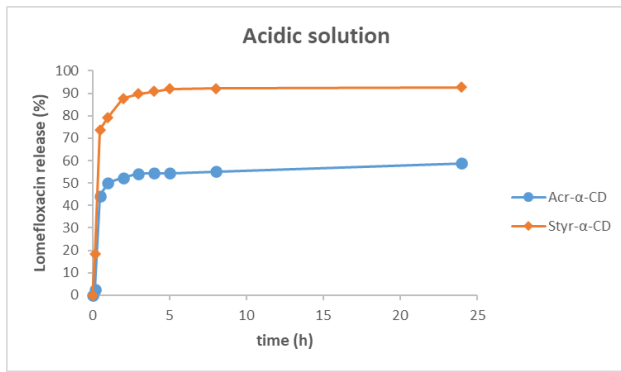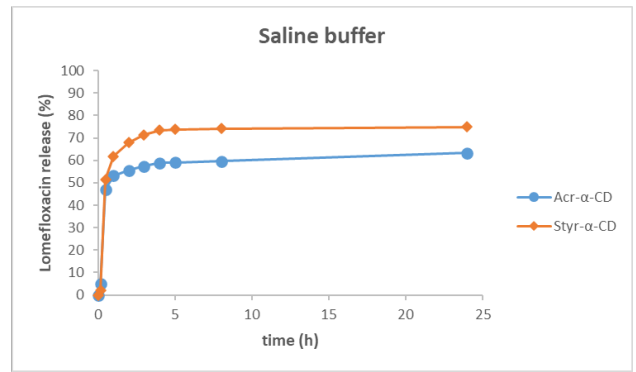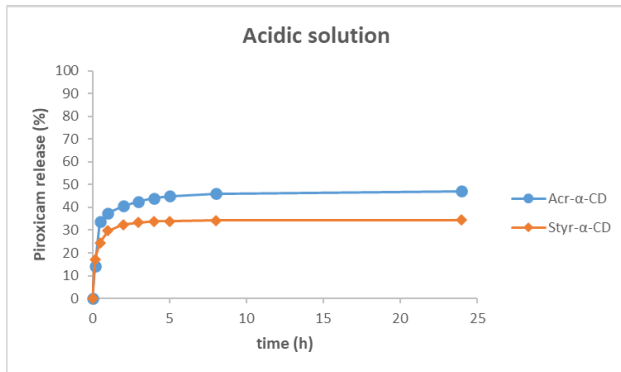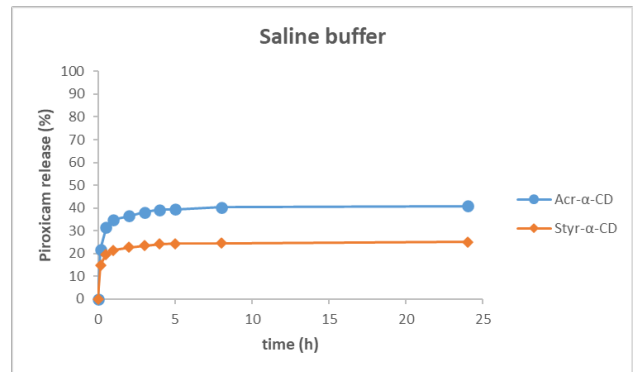

**Fig. S25** *In vitro* release profiles of LOM and PIR from  $\alpha$ -CD cryogels in media with pH a) 3 and b) 7.4 at 37 °C.

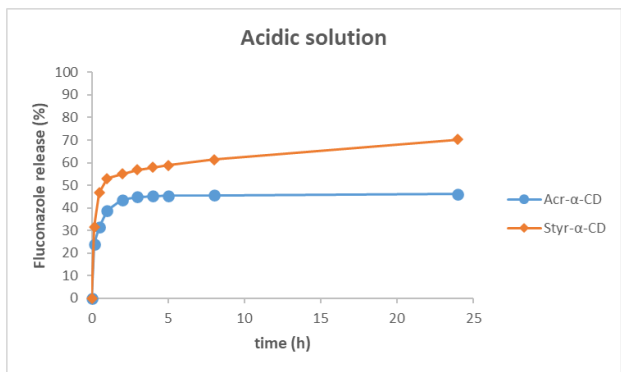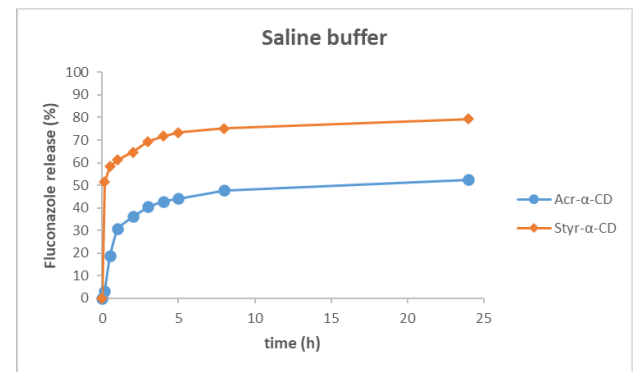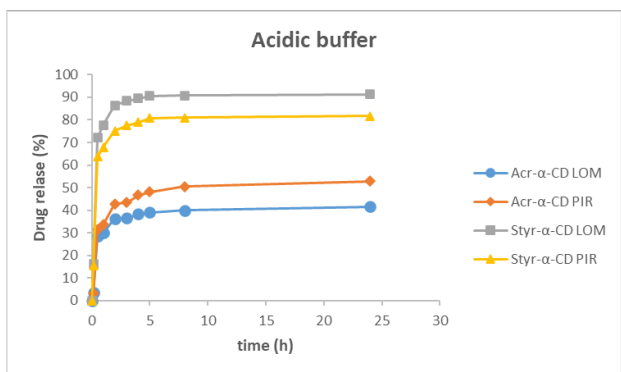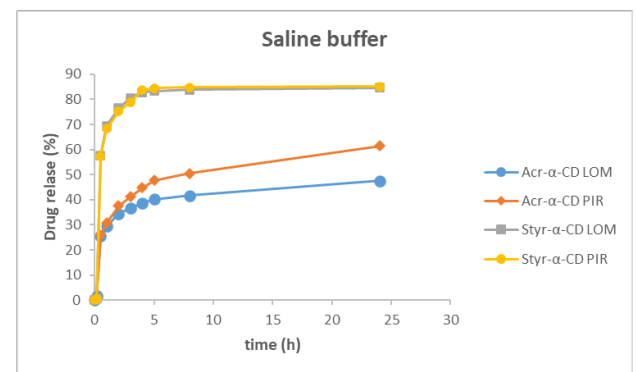

**Fig. S26** *In vitro* release profiles of FLU and Multidrug from  $\alpha$ -CD cryogels in media with pH a) 3 and b) 7.4 at 37 °C.

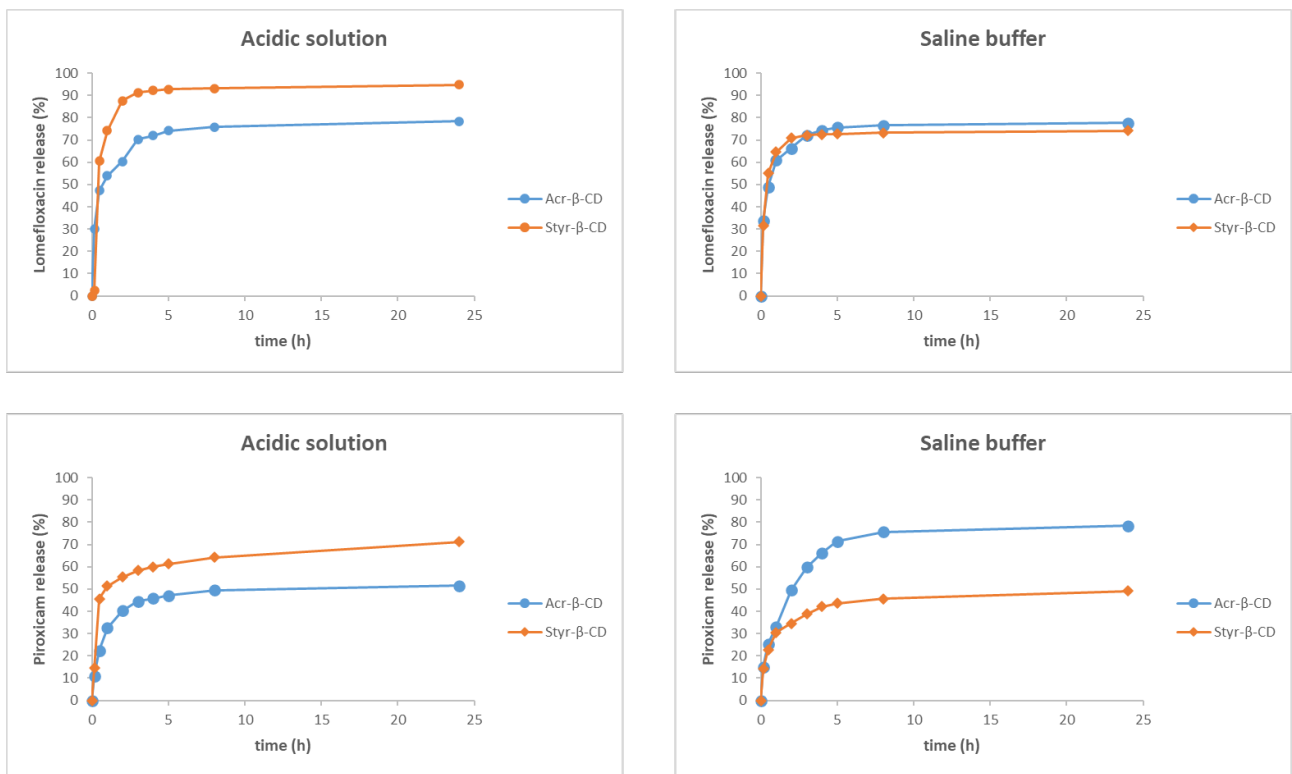

**Fig. S27** *In vitro* release profiles of LOM and PIR from  $\beta$ -CD cryogels in media with pH a) 3 and b) 7.4 at 37 °C.

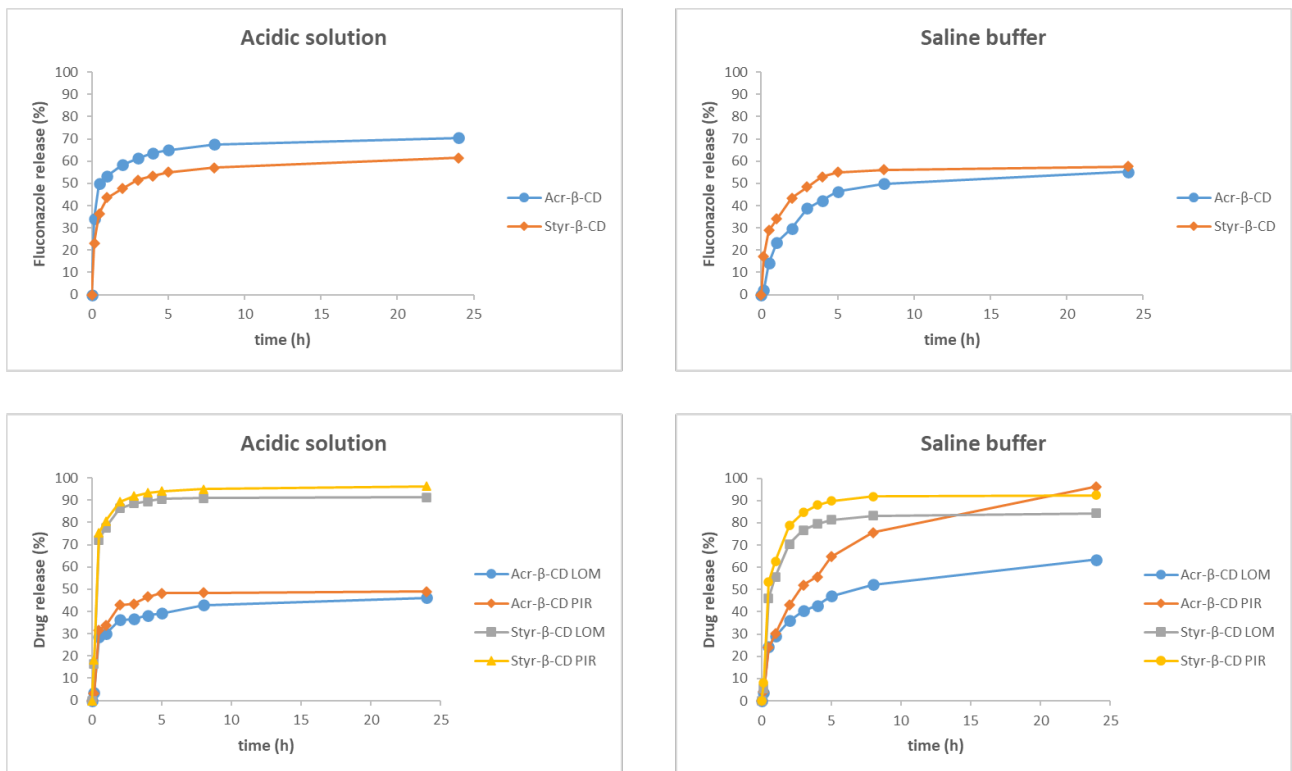

**Fig. S28** *In vitro* release profiles of FLU and Multidrug from  $\beta$ -CD cryogels in media with pH a) 3 and b) 7.4 at 37 °C.

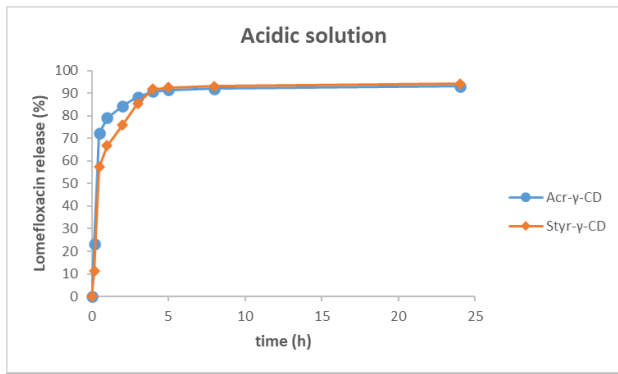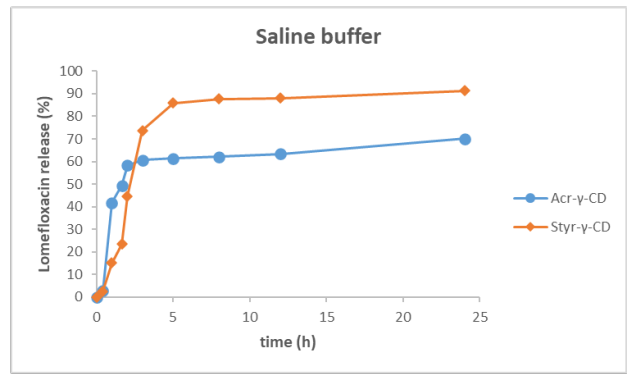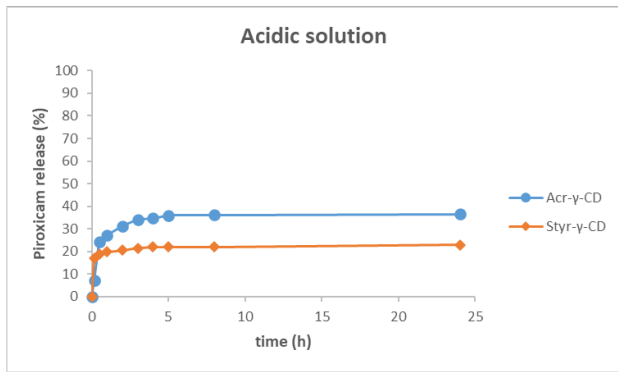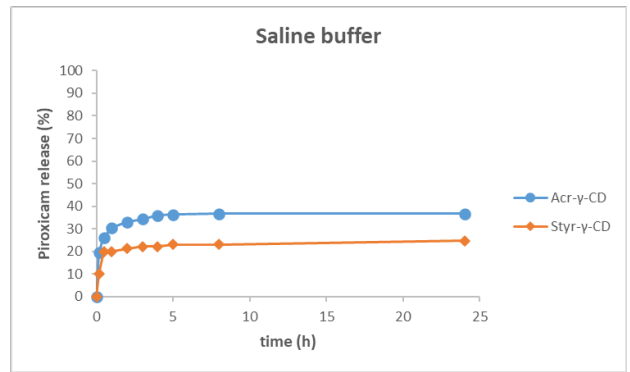

**Fig. S29** *In vitro* release profiles of LOM and PIR from  $\gamma$ -CD cryogels in media with pH a) 3 and b) 7.4 at 37 °C.

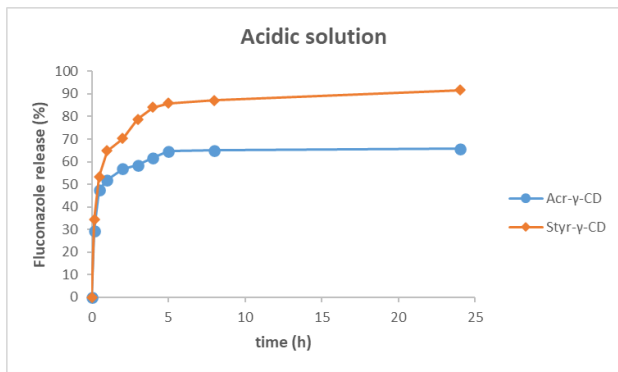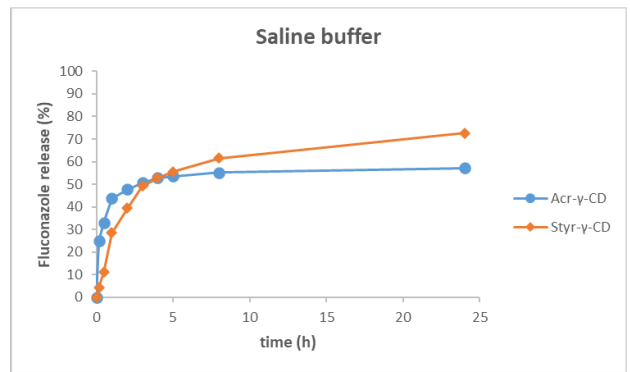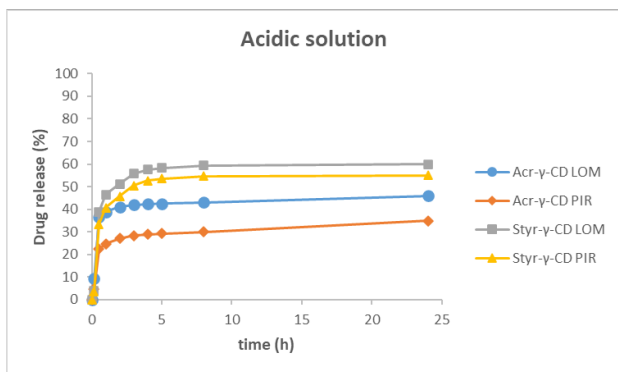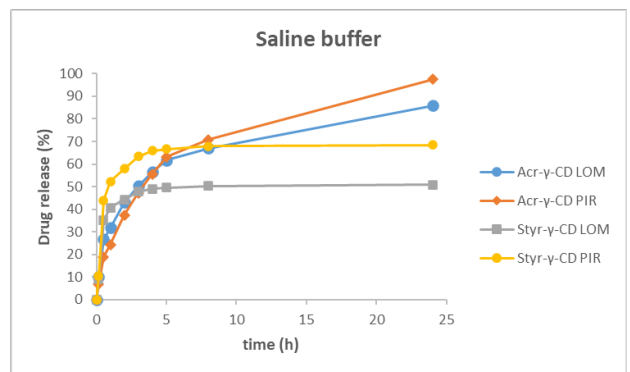

**Fig. S30** *In vitro* release profiles of FLU and Multidrug from  $\gamma$ -CD cryogels in media with pH a) 3 and b) 7.4 at 37 °C.



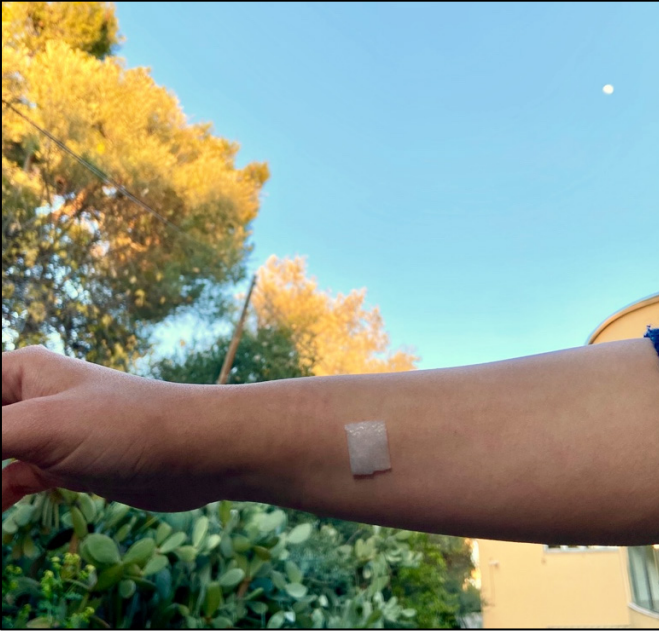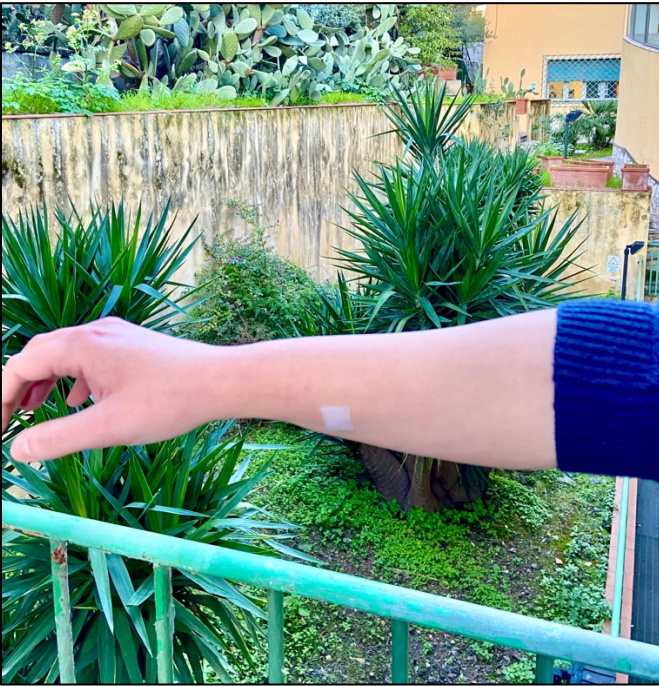

**Fig. S31** Pictures of a patch sample.

**Table S1** Kinetic release parameters for Lomefloxacin from cryogel samples at pH 3 and 7.4

|                    |        | Lomefloxacin |                |             |                |         |                |                  |       |                |         |       |                |
|--------------------|--------|--------------|----------------|-------------|----------------|---------|----------------|------------------|-------|----------------|---------|-------|----------------|
| Samples            | buffer | Zero Order   |                | First Order |                | Higuchi |                | Korsmeyer-Peppas |       |                | Weibull |       |                |
|                    |        | K            | R <sup>2</sup> | K           | R <sup>2</sup> | K       | R <sup>2</sup> | K                | n     | R <sup>2</sup> | a       | b     | R <sup>2</sup> |
| Hema               | Acidic | 0.587        | 0.879          | 0.017       | 0.983          | 7.034   | 0.966          | 10.269           | 0.419 | 0.972          | 0.042   | 0.762 | 0.988          |
|                    | Saline | 0.413        | 0.924          | 0.007       | 0.968          | 4.844   | 0.978          | 4.335            | 0.524 | 0.978          | 0.027   | 0.709 | 0.985          |
| Acr- $\alpha$ -CD  | Acidic | 0.397        | 0.763          | 0.007       | 0.843          | 4.851   | 0.881          | 9.120            | 0.365 | 0.898          | 0.067   | 0.508 | 0.910          |
|                    | Saline | 0.421        | 0.762          | 0.008       | 0.852          | 5.161   | 0.884          | 10.530           | 0.347 | 0.906          | 0.077   | 0.500 | 0.918          |
| Styr- $\alpha$ -CD | Acidic | 0.658        | 0.776          | 0.031       | 0.977          | 8.101   | 0.906          | 19.506           | 0.312 | 0.936          | 0.043   | 0.900 | 0.974          |
|                    | Saline | 0.511        | 0.806          | 0.012       | 0.918          | 6.168   | 0.908          | 9.490            | 0.408 | 0.917          | 0.050   | 0.664 | 0.937          |
| Acr- $\beta$ -CD   | Acidic | 0.484        | 0.832          | 0.011       | 0.914          | 5.944   | 0.952          | 18.144           | 0.260 | 0.996          | 0.158   | 0.386 | 0.997          |
|                    | Saline | 0.514        | 0.808          | 0.014       | 0.921          | 6.354   | 0.941          | 21.118           | 0.241 | 0.996          | 0.181   | 0.382 | 0.998          |
| Styr- $\beta$ -CD  | Acidic | 0.647        | 0.838          | 0.022       | 0.971          | 7.747   | 0.928          | 10.359           | 0.438 | 0.933          | 0.014   | 1.134 | 0.974          |
|                    | Saline | 0.532        | 0.776          | 0.017       | 0.929          | 6.615   | 0.923          | 22.514           | 0.236 | 0.984          | 0.182   | 0.399 | 0.990          |
| Acr- $\gamma$ -CD  | Acidic | 0.645        | 0.771          | 0.032       | 0.979          | 7.973   | 0.907          | 21.583           | 0.286 | 0.947          | 0.082   | 0.703 | 0.973          |
|                    | Saline | 0.431        | 0.830          | 0.008       | 0.907          | 5.181   | 0.926          | 7.504            | 0.421 | 0.932          | 0.049   | 0.600 | 0.945          |
| Styr- $\gamma$ -CD | Acidic | 0.591        | 0.848          | 0.018       | 0.967          | 5.181   | 0.926          | 11.817           | 0.392 | 0.955          | 0.052   | 0.723 | 0.972          |
|                    | Saline | 0.399        | 0.997          | 0.006       | 0.984          | 4.377   | 0.954          | 0.354            | 1.024 | 0.997          | 0.001   | 1.345 | 0.992          |

**Table S2** Kinetic release parameters for Piroxicam from cryogel samples at pH 3 and 7.4

|                    |        | Piroxicam  |                |             |                |         |                |                  |       |                |         |       |                |
|--------------------|--------|------------|----------------|-------------|----------------|---------|----------------|------------------|-------|----------------|---------|-------|----------------|
| Samples            | buffer | Zero Order |                | First Order |                | Higuchi |                | Korsmeyer-Peppas |       |                | Weibull |       |                |
|                    |        | K          | R <sup>2</sup> | K           | R <sup>2</sup> | K       | R <sup>2</sup> | K                | n     | R <sup>2</sup> | a       | b     | R <sup>2</sup> |
| Hema               | Acidic | 0.280      | 0.755          | 0.004       | 0.800          | 3.494   | 0.906          | 13.076           | 0.215 | 0.980          | 0.130   | 0.264 | 0.982          |
|                    | Saline | 0.185      | 0.725          | 0.002       | 0.753          | 2.321   | 0.886          | 9.055            | 0.207 | 0.969          | 0.091   | 0.235 | 0.970          |
| Acr- $\alpha$ -CD  | Acidic | 0.323      | 0.778          | 0.005       | 0.834          | 4.001   | 0.918          | 11.852           | 0.267 | 0.965          | 0.109   | 0.341 | 0.969          |
|                    | Saline | 0.282      | 0.716          | 0.004       | 0.763          | 3.560   | 0.882          | 16.543           | 0.168 | 0.991          | 0.172   | 0.207 | 0.992          |
| Styr- $\alpha$ -CD | Acidic | 0.246      | 0.773          | 0.003       | 0.811          | 3.071   | 0.921          | 11.599           | 0.213 | 0.994          | 0.116   | 0.253 | 0.995          |
|                    | Saline | 0.175      | 0.692          | 0.002       | 0.717          | 2.215   | 0.864          | 11.530           | 0.142 | 0.996          | 0.120   | 0.160 | 0.996          |
| Acr- $\beta$ -CD   | Acidic | 0.337      | 0.908          | 0.005       | 0.948          | 4.025   | 0.987          | 6.067            | 0.412 | 0.992          | 0.048   | 0.520 | 0.995          |
|                    | Saline | 0.456      | 0.958          | 0.008       | 0.986          | 5.345   | 0.999          | 5.556            | 0.492 | 0.999          | 0.035   | 0.677 | 0.997          |
| Styr- $\beta$ -CD  | Acidic | 0.423      | 0.788          | 0.008       | 0.875          | 5.209   | 0.918          | 13.143           | 0.301 | 0.952          | 0.106   | 0.431 | 0.960          |
|                    | Saline | 0.268      | 0.865          | 0.004       | 0.898          | 3.260   | 0.971          | 7.697            | 0.316 | 0.995          | 0.071   | 0.376 | 0.996          |
| Acr- $\gamma$ -CD  | Acidic | 0.239      | 0.834          | 0.003       | 0.866          | 2.912   | 0.944          | 5.986            | 0.346 | 0.963          | 0.054   | 0.405 | 0.966          |
|                    | Saline | 0.252      | 0.743          | 0.003       | 0.782          | 3.162   | 0.900          | 13.848           | 0.181 | 0.996          | 0.142   | 0.216 | 0.997          |
| Styr- $\gamma$ -CD | Acidic | 0.161      | 0.609          | 0.002       | 0.630          | 2.059   | 0.793          | 14.445           | 0.076 | 1.000          | 0.155   | 0.084 | 1.000          |
|                    | Saline | 0.164      | 0.713          | 0.002       | 0.737          | 2.066   | 0.876          | 8.445            | 0.196 | 0.966          | 0.085   | 0.219 | 0.967          |

**Table S3** Kinetic release parameters for Fluconazole from cryogel samples at pH 3 and 7.4

| Samples            | buffer | Fluconazole |                |             |                |         |                |                  |       |                |         |       |                |
|--------------------|--------|-------------|----------------|-------------|----------------|---------|----------------|------------------|-------|----------------|---------|-------|----------------|
|                    |        | Zero Order  |                | First Order |                | Higuchi |                | Korsmeyer-Peppas |       |                | Weibull |       |                |
|                    |        | K           | R <sup>2</sup> | K           | R <sup>2</sup> | K       | R <sup>2</sup> | K                | n     | R <sup>2</sup> | a       | b     | R <sup>2</sup> |
| Hema               | Acidic | 0.379       | 0.647          | 0.007       | 0.724          | 4.830   | 0.828          | 29.604           | 0.106 | 0.999          | 0.337   | 0.146 | 0.999          |
|                    | Saline | 0.342       | 0.723          | 0.006       | 0.789          | 4.299   | 0.887          | 18.305           | 0.187 | 0.983          | 0.185   | 0.246 | 0.985          |
| Acr- $\alpha$ -CD  | Acidic | 0.437       | 0.783          | 0.009       | 0.871          | 5.435   | 0.926          | 20.387           | 0.215 | 0.997          | 0.195   | 0.308 | 0.998          |
|                    | Saline | 0.274       | 0.904          | 0.004       | 0.935          | 3.229   | 0.969          | 3.264            | 0.498 | 0.969          | 0.026   | 0.595 | 0.974          |
| Styr- $\alpha$ -CD | Acidic | 0.423       | 0.716          | 0.009       | 0.813          | 5.331   | 0.883          | 24.168           | 0.173 | 0.989          | 0.245   | 0.251 | 0.991          |
|                    | Saline | 0.544       | 0.650          | 0.026       | 0.851          | 6.923   | 0.824          | 43.940           | 0.098 | 1.000          | 0.536   | 0.171 | 1.000          |
| Acr- $\beta$ -CD   | Acidic | 0.449       | 0.731          | 0.010       | 0.832          | 5.642   | 0.891          | 25.421           | 0.174 | 0.993          | 0.257   | 0.259 | 0.995          |
|                    | Saline | 0.241       | 0.955          | 0.003       | 0.971          | 2.778   | 0.983          | 1.600            | 0.617 | 0.985          | 0.012   | 0.711 | 0.987          |
| Styr- $\beta$ -CD  | Acidic | 0.369       | 0.801          | 0.006       | 0.863          | 4.562   | 0.937          | 15.132           | 0.242 | 0.993          | 0.143   | 0.320 | 0.995          |
|                    | Saline | 0.330       | 0.883          | 0.005       | 0.922          | 3.998   | 0.979          | 8.820            | 0.330 | 0.998          | 0.078   | 0.412 | 0.999          |
| Acr- $\gamma$ -CD  | Acidic | 0.432       | 0.746          | 0.009       | 0.842          | 5.412   | 0.902          | 21.822           | 0.199 | 0.987          | 0.211   | 0.289 | 0.990          |
|                    | Saline | 0.428       | 0.805          | 0.008       | 0.885          | 5.299   | 0.939          | 17.788           | 0.239 | 0.995          | 0.164   | 0.337 | 0.996          |
| Styr- $\gamma$ -CD | Acidic | 0.554       | 0.817          | 0.017       | 0.944          | 6.828   | 0.945          | 21.552           | 0.252 | 0.995          | 0.171   | 0.425 | 0.997          |
|                    | Saline | 0.305       | 0.972          | 0.004       | 0.988          | 3.467   | 0.981          | 1.375            | 0.695 | 0.989          | 0.009   | 0.846 | 0.992          |

**Table S4** Kinetic release parameters for Lomefloxacin in multidrug formulation from cryogel samples at pH 3 and 7.4

| Samples            | buffer | Lomefloxacin in multidrug |                |             |                |         |                |                  |       |                |         |       |                |
|--------------------|--------|---------------------------|----------------|-------------|----------------|---------|----------------|------------------|-------|----------------|---------|-------|----------------|
|                    |        | Zero Order                |                | First Order |                | Higuchi |                | Korsmeyer-Peppas |       |                | Weibull |       |                |
|                    |        | K                         | R <sup>2</sup> | K           | R <sup>2</sup> | K       | R <sup>2</sup> | K                | n     | R <sup>2</sup> | a       | b     | R <sup>2</sup> |
| Hema               | Acidic | 0.213                     | 0.833          | 0.003       | 0.861          | 2.616   | 0.955          | 7.153            | 0.284 | 0.992          | 0.069   | 0.326 | 0.993          |
|                    | Saline | 0.310                     | 0.828          | 0.005       | 0.873          | 3.781   | 0.943          | 8.516            | 0.326 | 0.967          | 0.075   | 0.406 | 0.971          |
| Acr- $\alpha$ -CD  | Acidic | 0.265                     | 0.804          | 0.004       | 0.844          | 3.221   | 0.913          | 5.780            | 0.375 | 0.927          | 0.050   | 0.451 | 0.932          |
|                    | Saline | 0.258                     | 0.831          | 0.003       | 0.866          | 3.100   | 0.926          | 4.527            | 0.419 | 0.932          | 0.038   | 0.499 | 0.938          |
| Styr- $\alpha$ -CD | Acidic | 0.647                     | 0.778          | 0.029       | 0.973          | 7.955   | 0.905          | 18.337           | 0.321 | 0.933          | 0.048   | 0.847 | 0.968          |
|                    | Saline | 0.575                     | 0.806          | 0.017       | 0.942          | 6.936   | 0.906          | 10.244           | 0.417 | 0.914          | 0.038   | 0.790 | 0.943          |
| Acr- $\beta$ -CD   | Acidic | 0.265                     | 0.804          | 0.004       | 0.844          | 3.221   | 0.913          | 5.782            | 0.375 | 0.927          | 0.050   | 0.451 | 0.932          |
|                    | Saline | 0.274                     | 0.882          | 0.004       | 0.914          | 3.264   | 0.960          | 4.190            | 0.447 | 0.963          | 0.035   | 0.534 | 0.967          |
| Styr- $\beta$ -CD  | Acidic | 0.647                     | 0.779          | 0.029       | 0.973          | 7.954   | 0.905          | 18.337           | 0.321 | 0.933          | 0.048   | 0.846 | 0.968          |
|                    | Saline | 0.526                     | 0.879          | 0.012       | 0.962          | 6.255   | 0.957          | 7.641            | 0.457 | 0.959          | 0.037   | 0.732 | 0.973          |
| Acr- $\gamma$ -CD  | Acidic | 0.311                     | 0.744          | 0.005       | 0.802          | 3.862   | 0.885          | 10.442           | 0.287 | 0.926          | 0.094   | 0.365 | 0.931          |
|                    | Saline | 0.331                     | 0.924          | 0.005       | 0.955          | 3.928   | 0.989          | 5.110            | 0.444 | 0.991          | 0.040   | 0.551 | 0.993          |
| Styr- $\gamma$ -CD | Acidic | 0.261                     | 0.824          | 0.004       | 0.861          | 3.154   | 0.924          | 5.012            | 0.401 | 0.934          | 0.043   | 0.479 | 0.939          |
|                    | Saline | 0.340                     | 0.812          | 0.005       | 0.868          | 4.152   | 0.928          | 8.758            | 0.340 | 0.950          | 0.073   | 0.439 | 0.956          |

**Table S5** Kinetic release parameters for Piroxicam in multidrug formulation from cryogel samples at pH 3 and 7.4

|                    |        | Piroxicam in multidrug |                |             |                |         |                |                  |       |                |         |       |                |
|--------------------|--------|------------------------|----------------|-------------|----------------|---------|----------------|------------------|-------|----------------|---------|-------|----------------|
| Samples            | buffer | Zero Order             |                | First Order |                | Higuchi |                | Korsmeyer-Peppas |       |                | Weibull |       |                |
|                    |        | K                      | R <sup>2</sup> | K           | R <sup>2</sup> | K       | R <sup>2</sup> | K                | n     | R <sup>2</sup> | a       | b     | R <sup>2</sup> |
| Hema               | Acidic | 0.267                  | 0.829          | 0.004       | 0.867          | 3.269   | 0.950          | 8.117            | 0.305 | 0.980          | 0.075   | 0.366 | 0.982          |
|                    | Saline | 0.393                  | 0.890          | 0.007       | 0.938          | 4.711   | 0.975          | 7.958            | 0.388 | 0.984          | 0.062   | 0.514 | 0.987          |
| Acr- $\alpha$ -CD  | Acidic | 0.310                  | 0.828          | 0.005       | 0.875          | 3.737   | 0.926          | 5.739            | 0.408 | 0.934          | 0.046   | 0.509 | 0.940          |
|                    | Saline | 0.283                  | 0.864          | 0.004       | 0.900          | 3.370   | 0.945          | 4.143            | 0.456 | 0.947          | 0.033   | 0.551 | 0.953          |
| Styr- $\alpha$ -CD | Acidic | 0.566                  | 0.776          | 0.020       | 0.942          | 6.967   | 0.905          | 16.776           | 0.312 | 0.936          | 0.095   | 0.578 | 0.954          |
|                    | Saline | 0.565                  | 0.802          | 0.016       | 0.936          | 6.814   | 0.903          | 10.143           | 0.415 | 0.911          | 0.041   | 0.765 | 0.938          |
| Acr- $\beta$ -CD   | Acidic | 0.310                  | 0.828          | 0.005       | 0.875          | 3.736   | 0.925          | 5.736            | 0.408 | 0.934          | 0.046   | 0.509 | 0.940          |
|                    | Saline | 0.332                  | 0.945          | 0.005       | 0.971          | 3.865   | 0.985          | 2.911            | 0.560 | 0.985          | 0.020   | 0.694 | 0.988          |
| Styr- $\beta$ -CD  | Acidic | 0.671                  | 0.776          | 0.033       | 0.978          | 8.262   | 0.905          | 19.815           | 0.313 | 0.935          | 0.026   | 1.072 | 0.980          |
|                    | Saline | 0.586                  | 0.869          | 0.016       | 0.972          | 7.005   | 0.953          | 9.519            | 0.435 | 0.957          | 0.037   | 0.790 | 0.976          |
| Acr- $\gamma$ -CD  | Acidic | 0.206                  | 0.788          | 0.003       | 0.818          | 2.518   | 0.910          | 5.444            | 0.335 | 0.934          | 0.050   | 0.385 | 0.937          |
|                    | Saline | 0.293                  | 0.970          | 0.004       | 0.985          | 3.387   | 0.995          | 2.304            | 0.582 | 0.997          | 0.017   | 0.694 | 0.997          |
| Styr- $\gamma$ -CD | Acidic | 0.340                  | 0.842          | 0.005       | 0.892          | 4.084   | 0.935          | 5.992            | 0.418 | 0.942          | 0.046   | 0.535 | 0.949          |
|                    | Saline | 0.446                  | 0.831          | 0.009       | 0.913          | 5.409   | 0.939          | 10.176           | 0.365 | 0.954          | 0.072   | 0.529 | 0.964          |
